# Supplementary material for: Clinical Impact, Costs, and Cost-Effectiveness of Expanded SARS-CoV-2 Testing in Massachusetts
Source: PubMed Central journal article supplement — medRxiv. 2020 Jul 24:2020.07.23.20160820. Preprint. [Version 1] doi: 10.1101/2020.07.23.20160820 (PMC7386528; doi:10.1101/2020.07.23.20160820), 2020-07-24

## **SUPPLEMENTARY MATERIAL**

### **Clinical Impact, Costs, and Cost-Effectiveness of Expanded SARS-CoV-2 Testing in Massachusetts**

Anne M. Neilan, MD, MPH; Elena Losina, PhD; Audrey C. Bangs, BA; Clare Flanagan, MPH;  
Christopher Panella, BS; G. Ege Eskibozkurt, BA; Amir Mohareb, MD; Emily P. Hyle, MD,  
MSc; Justine A. Scott, MPH; Milton C. Weinstein, PhD; Mark J. Siedner, MD, MPH; Krishna P.  
Reddy, MD, MS; Guy Harling, ScD, MPH; Kenneth A. Freedberg, MD, MSc; Fatma M. Shebl,  
MD, PhD; Pooyan Kazemian, PhD; Andrea L. Ciaranello, MD, MPH

## TABLE OF CONTENTS

### Supplementary Methods

**Supplementary Table 1.** Additional input parameters for a model of COVID-19 disease and testing in Massachusetts

**Supplementary Table 2.** Clinical and resource utilization outcomes for a model of COVID-19 disease and testing in Massachusetts, results per million

**Supplementary Table 3.** One-way sensitivity analysis: PCR test sensitivity

**Supplementary Table 4.** One-way sensitivity analysis: probability of test acceptance

**Supplementary Table 5.** One-way sensitivity analysis: transmission reduction after a positive PCR test result

**Supplementary Table 6.** One-way sensitivity analysis: percent of people with severe disease presenting to hospital

**Supplementary Table 7.** One-way sensitivity analysis: probability of surviving an intensive care unit admission

**Supplementary Table 8.** One-way sensitivity analysis: PCR test cost

**Supplementary Table 9.** One-way sensitivity analysis: additional cost of offering a PCR test

**Supplementary Table 10.** One-way sensitivity analysis: hospital bed-day cost

**Supplementary Table 11.** One-way sensitivity analysis: intensive care unit bed-day cost

**Supplementary Table 12.** Scenario analysis:  $R_e$  threshold for cost-effectiveness of PCR-all-repeat testing strategy

**Supplementary Table 13.** Sensitivity analysis for PCR-all-repeat testing: Frequency of retesting those with no observed symptoms (surging scenario:  $R_e$  2.0)

**Supplementary Table 14.** Scenario analysis: varying COVID-19-like illness rates

**Supplementary Table 15.** Scenario analysis: estimates of life-years lost per death due to COVID-19

**Supplementary Table 16.** Scenario analysis: incremental cost-effectiveness ratios incorporating costs related to lost productivity and averted COVID-19-related mortality

**Supplementary Figure 1.** Flow diagrams: Modeled SARS-CoV-2 testing strategies

**Supplementary Figure 2.** Health state transitions for a model of COVID-19 disease and testing

**Supplementary Figure 3.** One-way sensitivity analyses: Incident SARS-CoV-2 infections (2A-C) and mortality (2D-F) over 180 days in Massachusetts

**Supplementary Figure 4.** Two-way sensitivity analyses: PCR test cost and additional cost of offering a PCR test

## **INTRODUCTION**

This appendix provides methodologic details to supplement the description of methods in the manuscript text, including summary of CEACOV model structure, model inputs, calibration and results.

## SUPPLEMENTARY METHODS

### Natural history

#### *COVID-19 disease*

The following health states are modeled: (1) susceptible, (2) people who acquire SARS-CoV-2, and (3) COVID-19-related death (Supplementary Figure 1). Susceptible people experience a daily probability of acquiring SARS-CoV-2 from people with COVID-19 in health states which transmit infection. People who acquire SARS-CoV-2 may progress through the following health states: (2a) latent, (2b) asymptomatic, (2c) mild/moderate illness, (2d) severe illness, (2e) critical illness, (2f) recuperation, and (2g) recovered (Supplementary Table 1). In health state 2a, people with latent infection experience daily probabilities of progressing to asymptomatic infection (all those with latent infection eventually progress). In health state 2b, people who are asymptomatic experience daily probabilities of progressing to mild/moderate illness or recovering. In health state 2c, people with mild/moderate illness experience daily probabilities of progressing to severe illness or recovering. In health state 2d, people with severe illness experience daily probabilities of progressing to critical illness or recovering. In health state 2e, people with critical illness experience daily probabilities of dying from COVID-19 or recuperating. In health state 2f, people previously critical experience daily probabilities of recovering. While recuperating, they are assumed to stay in the hospital or other non-long-term care facility with improved/resolving symptoms. People in health states 2b-2f can transmit SARS-CoV-2 to others. In the recovered health state, people remain in this absorbing health state and are assumed to have immunity to SARS-CoV-2 over the time horizon of model run.

*Derivation of COVID-19-like illness inputs*

Individuals with symptoms due to conditions other than COVID-19 (“COVID-19-like-illness”), may present for symptom screening or PCR testing. Estimates of the number of people presenting for testing with “COVID-19-like illness” are uncertain at the time this analysis is being conducted; therefore, we made assumptions informed by available literature from influenza-like illness. Data from the National Ambulatory Medical Care Survey (NAMCS) were used to estimate the age-stratified per-person daily rate of presenting to one’s primary care physician [1]. Of these visits 15% were assumed to be related to COVID-19, based on estimates from New Jersey depicting approximately 15% of people presenting with influenza-like symptoms that were not actually due to influenza; among these, 75% were assumed to have symptoms due to conditions other than COVID-19 [2]. We additionally considered a second set of COVID-19-like illness inputs (“summer” COVID-19-like illness) to reflect the possibility that fewer people present for testing outside of influenza season. These were derived from NAMCS and the U.S. Outpatient Influenza-like Illness Surveillance Network (ILINet) [1,3].

**Summer COVID-19-like illness probabilities**

| Age, years | Mild       | Severe     | Critical   |
|------------|------------|------------|------------|
| <19        | 0.00010058 | 0.00000519 | 0.00000011 |
| 19-65      | 0.00012243 | 0.00000632 | 0.00000013 |
| >65        | 0.00015029 | 0.00000775 | 0.00000016 |

## Transmissions

The basic reproduction number ( $R_0$ ) is defined as the daily rate at which an infected individual contacts susceptible individuals and infects them in a fully susceptible cohort, multiplied by the duration of infectivity:

$$R_0 = K * b * D$$

- K: number of contacts per day an infected individual has with susceptible people in a fully susceptible cohort
- b: the probability of infecting the susceptible person per contact
- D: the average duration of infectivity

Subsequently, in the model,

$$\textit{Effective Transmission Rate} = \textit{Nominal Transmission Rate} * \textit{Transmission multiplier}$$

where

$$\textit{Nominal Transmission Rate} = R_0/D.$$

The Nominal Transmission Rate is a function of the average number of contacts per day an infected individual has with susceptible people in a fully susceptible cohort (K) multiplied by the probability of infecting the susceptible person per contact (b). Equivalently, it can be defined as  $R_0$  in a fully susceptible cohort divided by the average duration of infectivity (D). This Nominal Transmission Rate captures the ratio of daily infectivity stratified by disease states. Infected individuals do not transmit while they are in the latent state (2a) or in the recovered state (2g).

Patients in other infected states (2b-2f) can transmit SARS-CoV-2 to susceptible individuals. The effective magnitude of the transmission rate changes over time as social interventions alter number of contacts ( $K$ ) and infectivity ( $b$ ), and subsequently, the effective reproduction number ( $R_e$ ); thus, the magnitude is adjusted using the transmission multiplier.

Transmission multipliers are setting-specific, time-dependent adjusting factors, roughly accounting for population density and interventions that can alter the number of contacts ( $K$ ) and infectivity ( $b$ ) in the setting being modeled. In this analysis, these transmission multipliers are calibrated to the COVID-19 epidemic in Massachusetts, US. The transmission multiplier is used to model the effect of reducing contacts ( $K$ ) resulting from social distancing measures, such as the stay-at-home advisory issued on March 21, 2020 in Massachusetts, as well as masking strategies that can decrease infectivity ( $b$ ).

We assume that all susceptible people have an equal probability of contacting infected individuals and acquiring the virus (*i.e.*, homogenous mixing). As the epidemic grows, the number of susceptible people declines. Thus, not all of the daily contacts of infected individuals will be with susceptible people. The daily infection rate for a susceptible person is equal to the sum of transmission rates from all infected people across all infection states divided by the cohort size. This leads to an expected daily number of infections equal to the number of susceptible people multiplied by the infection rate on that day.

### *Derivation of reduction in transmission associated with test results*

We associate each testing strategy with a reduction in transmission (Manuscript Table 1) based on two parameters: (1) likelihood of adherence to isolation directives and (2) the reduction in the average number of close contacts that results from isolation. At the time of this analysis there were no data specific to the COVID-19 pandemic reporting these parameters of interest. Therefore, we made assumptions informed by the available literature on public response to isolation directives with and without direct counseling and test results.

First, for people with mild/moderate symptoms, we assume that approximately 20% of the Massachusetts population (excluding those residing in long-term care facilities) would not be capable of or willing to be screened under the PCR-severe-only or Self-screen strategy and follow the subsequent recommendations for self-isolation when either strategy returns a positive result. For the remaining 80%, we estimate the maximal adherence to directives for isolation would be 85-94% [4]. For those with maximal adherence, we estimate that isolation would decrease the number of close contacts for all age groups by 75-80% [5,6]. We assume that isolation directives would be more effective when directly delivered by a medical or public health provider with counseling following a positive PCR test compared to the instructions received following a positive self-screen on an electronic device. This difference is partly based on the ability of the general public to engage in and implement public health messaging about COVID-19 outside of the context of specific provider-director counseling [7]. Therefore, we assign the transmission reduction associated with a positive self-screen in people with mild/moderate symptoms to be 20% and the transmission reduction associated with a positive PCR test to be 65%.



We assume that people who receive a negative PCR test, regardless of the presence of symptoms, would be reassured that they do not have COVID-19 and would not engage in self-isolation. Therefore, the transmission reduction for people with a negative PCR test, regardless of symptoms, is 0%. This means that in our model, individuals with COVID-19 who receive a false negative PCR test result will have no reduction in the transmission probability because they are behaving under the assumption that they do not have COVID-19.

Individuals with severe/critical illness in all strategies are assumed to be hospitalized, which results in 90% reduction in transmission. Hospitalization eliminates the number of susceptible social contacts exposed to an index patient but introduces contacts with healthcare workers and other patients. Transmission risk associated with any one of these contacts would be greatly reduced due to hospital-based infection control and isolation practices [8,9].

### **Validation and calibration**

We initiated the model with a cohort of 1 million simulated people who are meant to represent the 6.9 million population of Massachusetts in 2020. Each person's age category was drawn at model start based on Massachusetts age distribution data [10]. We started the simulation in mid-March and set the prevalence of COVID-19 at model start to 0.14% [11]. We tracked the number of people in each health state over a 45-day horizon (30 days for calibration; 15 days for validation).

We calibrated the transmission multiplier (see Transmissions above) to the COVID-19 epidemic in Massachusetts from mid-March to mid-April (30 days). The remaining 15 days were used for validation. We assumed the reported number of COVID-19-related deaths would be close to the actual number of deaths. Hence, the number of reported COVID-19-related deaths was the primary calibration target. We adjusted cumulative mortality (3,716 deaths by May 1, 2020) by removing the 59% of COVID-19-related deaths that occurred in long-term care facilities and not in the community [12,13]. This led to a series of time dependent  $R_e$  estimates (Supplementary Table 1).

We assumed 80% of patients with severe and critical symptoms would present to care and be tested and detected. To ensure a good model fit, we used the mean absolute percentage error (MAPE) and the median absolute percentage error (MEDAPE) for modeled and observed number of deaths over the validation horizon.

## **Costs and cost-effectiveness**

### *Daily hospital ward and intensive care unit (ICU) costs*

To estimate the total costs for a hospitalization (ward or ICU) due to COVID-19, we first assumed each patient would be billed for the average Medicare-allowed inpatient coverage, including pneumonia-related diagnoses, ventilator use, and professional costs. This included Medicare-allowed coverage of diagnosis-related group (DRG) 193, “simple pneumonia and pleurisy with major complications,” DRG 194, “pneumonia with complications or comorbidity,” and DRG 195, “pneumonia without complications.” We assumed COVID-19 patients requiring hospital ward beds would be distributed evenly among these three diagnoses. For patients

requiring ICU-level care, we additionally included the diagnoses DRG 207, “respiratory system diagnosis with ventilator support required for 96 hours or more,” and DRG 208, “respiratory system diagnosis with ventilator support required for less than 96 hours.” We divided the total cost for a hospital stay and a hospital stay requiring ICU-level care by the average number of days spent in the hospital by a pneumonia patient and an ICU patient, respectively. This yielded the cost of a day spent in a hospital bed and an ICU bed. We lastly added a professional cost of \$395, as allowed by Medicare, to the daily hospital and ICU bed costs to yield the final total constant daily costs of hospitalization (\$1,640) and ICU care (\$2,680) [14–16].

### *Cost-effectiveness*

We calculated the incremental cost-effectiveness ratio (ICER) for each strategy from the healthcare sector perspective, the societal perspective, and again from the societal perspective while additionally accounting for the added healthcare costs associated with saving a life-year due to averted COVID-19-related mortality. All three sets of calculations relied on quantifying the number of quality-adjusted life-years lost per death related to COVID-19. First, we used data from the Massachusetts Department of Health to estimate the average age of deaths related to COVID-19 [12]. Because the available data included total age-stratified deaths and this model was calibrated to exclude deaths from those in long-term care facilities (LTCF), we first estimated the proportion of deaths in each age bracket that occurred in LTCF. We assumed that deaths in LTCF among people ages  $\geq 60$  years occur in the same proportions as total COVID-19-related deaths. This yielded age-stratified estimates for the number of deaths occurring among people in LTCF. We then subtracted these estimates from the total number of COVID-19-related deaths in the corresponding age group and used the resulting distribution to estimate the mean

age of death from COVID-19 in the non-institutionalized population of Massachusetts (76.3 years). Given the average life expectancy for a Massachusetts resident (80.6 years), we estimated that a death due to COVID-19 resulted in a loss of 4.3 life-years.

We applied preference-based utility weights in the form of age-dependent EQ-5D scores to estimate a quality adjustment for each life-year lost due to death from COVID-19 [17,18]. We additionally discounted each quality-adjusted life-year lost by 3%/year. This resulted in an average of 3.18 discounted quality-adjusted life-years lost due to a death from COVID-19. We multiplied the number of model-projected deaths for each strategy by 3.18 to yield the total quality-adjusted life-years lost per strategy.

To calculate ICERs, we sorted strategies by increasing cost and divided the difference in cost by the difference in total quality-adjusted life-years lost for each strategy compared to the next most expensive strategy. This results in a ratio that represents the value of a strategy relative to the next best option, in dollars per quality-adjusted life-year (\$/QALY).

When calculating ICERs in the base case, we considered only direct medical costs borne either by the patient or a third party payer [17]. These include the costs of PCR testing (\$51/test) [19] and hospitalizations for COVID-19, accounting for patient-time spent both on a general hospital ward (\$1,640/day) and in the ICU (\$2,680/day, see above).

### *Scenario analyses*

We also considered three alternative approaches to estimating ICERS:

### 1. Direct medical costs (base case) and an alternative estimate of life-year lost

We applied an alternative estimate of life-years lost based on an approach employed by the Global Burden of Disease study of the Institute for Health Metrics and Evaluation as described in another CEACOV model-based analysis (5.61 discounted, quality-adjusted life-years lost per death averted vs. the base case estimate of 3.18 quality-adjusted life-years lost per death averted) (Supplementary Table 15) [20].

### 2. Direct medical costs (base case) and lost productivity (Indirect costs of hospitalization and self-isolation)

We accounted for the indirect costs of hospitalization and self-isolation (lost productivity) due to infection with SARS-CoV-2, in addition to the direct medical costs as described above (Supplementary Table 16). To determine the indirect costs associated with lost productivity for days spent hospitalized and in self-isolation, we first estimated the average hourly wage of a worker in the US using data from the Employer Costs for Employee Compensation, released quarterly by the US Bureau of Labor Statistics [21]. We calculated the average hourly wage for civilian workers across the four quarters of 2019 and assumed an eight-hour workday to estimate the average daily wages for a US worker (\$295). To account for many COVID-19 patients being older and out of the workforce, we first used Massachusetts Department of Health data to determine the age distributions of COVID-19 patients in Massachusetts requiring hospitalization and those not requiring hospitalization [12]. We assumed patients aged 65 and older are not working, and thus accrue no lost productivity costs while either in the hospital or in self-isolation. For those under 65, we assumed all patients, including minors, accrue lost productivity

costs since parents of children sick with COVID-19 may have to miss work or make alternate childcare arrangements. We assumed a day spent in the hospital would result in a complete loss of productivity, thus patients under 65 incurred a cost equal to the full average daily wage of a US worker for each day spent in the hospital. We assumed a day spent in self-isolation would halve productivity, based on some patients' ability to work remotely at least part of the time while experiencing mild/moderate illness, or while caring for a sick child with mild/moderate illness. We calculated the weighted average of lost productivity costs due to hospitalization and self-isolation across the age distributions of hospitalized and non-hospitalized COVID-19 patients, respectively, to yield the lost productivity cost for a day spent hospitalized (\$112) and in self-isolation (\$115).

### 3. Direct medical costs (base case) and lost productivity and added healthcare costs due to averted morality

To estimate the costs that would be incurred for someone whose death was averted by one of our strategies. To do this, we first sorted strategies by increasing cost and calculated the number of incremental deaths averted for each strategy compared to the next most expensive strategy. For each incremental death averted, we applied a cost based on national data reporting mean annual healthcare expenses for people ages  $\geq 65$  years (\$10,125) [22]. We multiplied this per-year cost by 4.33 based on the estimated life-years (discounting 3% yearly) lost due to a death from COVID-19 (see above). This resulted in a total discounted cost of \$41,600, which represents the added healthcare costs required by the average person whose death from COVID-19 was averted by one of our strategies. We multiplied the number of incremental deaths averted for each strategy by \$41,600 to obtain the total discounted cost of life-years-saved for each strategy and

added this to the original cost of the strategy. We re-ordered the strategies by this adjusted total cost and calculated ICERs as described above (Supplementary Table 16).

## REFERENCES

1. Rui P, Okeyode T. National ambulatory medical care survey: 2016 national summary tables. Atlanta, GA: National Center for Health Statistics, Centers for Disease Control and Prevention, 2019. Available at: [https://www.cdc.gov/nchs/data/ahcd/namcs\\_summary/2016\\_namcs\\_web\\_tables.pdf](https://www.cdc.gov/nchs/data/ahcd/namcs_summary/2016_namcs_web_tables.pdf). Accessed 18 June 2020.
2. Why a study showing that COVID-19 is everywhere is good news. *The Economist* Available at: <https://www.economist.com/graphic-detail/2020/04/11/why-a-study-showing-that-covid-19-is-everywhere-is-good-news>. Accessed 18 June 2020.
3. Centers for Disease Control and Prevention National Center for Immunization and Respiratory Diseases. Overall Percentages of Visits for ILI and Percentage of Visits for ILI by Age Group Reported by A Subset of ILINet Providers. 2020. Available at: <https://www.cdc.gov/coronavirus/2019-ncov/covid-data>. Accessed 4 July 2020.
4. Blendon RJ, Koonin LM, Benson JM, et al. Public response to community mitigation measures for pandemic influenza. *Emerg Infect Dis* **2008**; 14:778–786.
5. Edwards CH, Tomba GS, de Blasio BF. Influenza in workplaces: transmission, workers' adherence to sick leave advice and European sick leave recommendations. *Eur J Public Health* **2016**; 26:478–485.
6. Jackson C, Mangtani P, Vynnycky E, et al. School closures and student contact patterns. *Emerg Infect Dis* **2011**; 17:245–247.
7. Wolf MS, Serper M, Opsasnick L, et al. Awareness, attitudes, and actions related to COVID-19 among adults with chronic conditions at the onset of the U.S. outbreak. *Ann*



Intern Med **2020**; Available at: <https://www.acpjournals.org/doi/10.7326/M20-1239>.

Accessed 18 June 2020.

8. Wee LE, Hsieh JYC, Phua GC, et al. Respiratory surveillance wards as a strategy to reduce nosocomial transmission of COVID-19 through early detection: the experience of a tertiary-care hospital in Singapore. *Infect Control Hosp Epidemiol* **2020**; 41:820–825.
9. Wee LE, Sim XYJ, Conceicao EP, et al. Containment of COVID-19 cases among healthcare workers: the role of surveillance, early detection, and outbreak management. *Infect Control Hosp Epidemiol* **2020**; 41:765–771.
10. Census profile: Massachusetts. Available at: <http://censusreporter.org/profiles/04000US25-massachusetts/>. Accessed 16 April 2020.
11. Massachusetts Department of Public Health. Archive of COVID-19 cases in Massachusetts. Available at: <https://www.mass.gov/info-details/archive-of-covid-19-cases-in-massachusetts>. Accessed 16 April 2020.
12. Massachusetts Department of Public Health. Massachusetts Department of Public Health COVID-19 dashboard. 2020. Available at: <https://www.mass.gov/info-details/covid-19-response-reporting# covid-19-daily-dashboard->. Accessed 15 July 2020.
13. Yourish K, Lai KKR, Ivory D, Smith M. One-third of all U.S. coronavirus deaths are nursing home residents or workers. *The New York Times*. Available at: <https://www.nytimes.com/interactive/2020/05/09/us/coronavirus-cases-nursing-homes-us.html>. Accessed 29 May 2020.
14. Cox C, Rudowitz R, Neuman T, Cubanski J, Rae M. How health costs might change with COVID-19. Peterson-Kaiser Family Foundation (KFF) Health System Tracker. 2020;

Available at: <https://www.healthsystemtracker.org/brief/how-health-costs-might-change-with-covid-19/>. Accessed 4 June 2020.

15. Rae M, Claxton G, Kurani N, McDermott D, Cox C. Potential costs of COVID-19 treatment for people with employer coverage. Peterson-Kaiser Family Foundation (KFF) Health System Tracker. 2020; Available at: <https://www.healthsystemtracker.org/brief/potential-costs-of-coronavirus-treatment-for-people-with-employer-coverage/>. Accessed 4 June 2020.
16. COVID 19: the projected economic impact of the COVID-19 pandemic on the US healthcare system. FAIR Health, 2020. Available at: <https://s3.amazonaws.com/media2.fairhealth.org/brief/asset/COVID-19%20-%20The%20Projected%20Economic%20Impact%20of%20the%20COVID-19%20Pandemic%20on%20the%20US%20Healthcare%20System.pdf>. Accessed 7 July 2020.
17. Sanders GD, Neumann PJ, Basu A, et al. Recommendations for conduct, methodological practices, and reporting of cost-effectiveness analyses: Second panel on cost-effectiveness in health and medicine. *JAMA* **2016**; 316:1093–1103.
18. Sullivan PW, Ghushchyan V. Preference-based EQ-5D index scores for chronic conditions in the United States. *Med Decis Making* **2006**; 26:410–420.
19. Medicare administrative contractor (MAC) COVID-19 test pricing May 19, 2020. 2020. Available at: <https://www.cms.gov/files/document/mac-covid-19-test-pricing.pdf>.
20. Reddy KP, Shebl FM, Foote JHA, et al. Cost-effectiveness of public health strategies for COVID-19 epidemic control in South Africa. *medRxiv* **2020**; Available at: <http://medrxiv.org/lookup/doi/10.1101/2020.06.29.20140111>. Accessed 13 July 2020.

21. Employer costs for employee compensation archived news releases. 2019. Available at: <https://www.bls.gov/bls/news-release/ecec.htm#2018>. Accessed 4 June 2020.
22. National Center for Health Statistics. Health, United States, 2016: with chartbook on long-term trends in health. Hyattsville, MD: 2017. Available at: <https://www.cdc.gov/nchs/data/hs/hs16.pdf>.
23. Report of the WHO-China joint mission on coronavirus disease 2019 (COVID-19). World Health Organization, 2020. Available at: [https://www.who.int/publications-detail/report-of-the-who-china-joint-mission-on-coronavirus-disease-2019-\(covid-19\)](https://www.who.int/publications-detail/report-of-the-who-china-joint-mission-on-coronavirus-disease-2019-(covid-19)). Accessed 16 April 2020.
24. Hu Z, Song C, Xu C, et al. Clinical characteristics of 24 asymptomatic infections with COVID-19 screened among close contacts in Nanjing, China. *Sci China Life Sci* **2020**; Available at: <https://doi.org/10.1007/s11427-020-1661-4>. Accessed 16 April 2020.
25. Zhou F, Yu T, Du R, et al. Clinical course and risk factors for mortality of adult inpatients with COVID-19 in Wuhan, China: a retrospective cohort study. *Lancet* **2020**; 395:1054–1062.
26. He X, Lau EHY, Wu P, et al. Temporal dynamics in viral shedding and transmissibility of COVID-19. *Nature Medicine* **2020**; 26:672–675.
27. Linton NM, Kobayashi T, Yang Y, et al. Incubation period and other epidemiological characteristics of 2019 novel coronavirus infections with right truncation: a statistical analysis of publicly available case data. *J Clin Med* **2020**; 9. Available at: <https://www.ncbi.nlm.nih.gov/pmc/articles/PMC7074197/>. Accessed 16 April 2020.
28. Wang D, Hu B, Hu C, et al. Clinical characteristics of 138 hospitalized patients with 2019 novel coronavirus–infected pneumonia in Wuhan, China. *JAMA* **2020**; 323:1061–1069.

**Supplementary Table 1.** Additional input parameters for a model of COVID-19 disease and testing in Massachusetts

| Parameter                                                                       | Value        |               |           |          |
|---------------------------------------------------------------------------------|--------------|---------------|-----------|----------|
|                                                                                 | 0-19 years   | 20-59 years   | ≥60 years |          |
| Distribution of clinical disease progression severity (%), <sup>a</sup> [23–26] |              |               |           |          |
| Asymptomatic infection                                                          | 52.39        | 26.20         | 18.00     |          |
| Mild/moderate illness                                                           | 47.10        | 71.95         | 78.79     |          |
| Severe illness                                                                  | 0.50         | 1.18          | 0.09      |          |
| Critical illness                                                                | 0.01         | 0.67          | 3.12      |          |
| Time to health state transition, by ultimate stage of disease, mean, days       | Asymptomatic | Mild/moderate | Severe    | Critical |
| Latent to asymptomatic infection                                                | 2.6          | 2.6           | 2.6       | 2.6      |
| Asymptomatic infection to mild/moderate illness [23,27]                         | –            | 2.0           | 2.0       | 2.0      |
| Mild/moderate to severe illness [28]                                            | –            | –             | 6.5       | 3.0      |
| Severe to critical illness [25]                                                 | –            | –             | –         | 7.1      |
| Critical illness to recuperation                                                | –            | –             | –         | 11.9     |
| Recuperation to recovery                                                        | –            | –             | –         | 5.7      |
| COVID-19-like illness                                                           |              |               |           |          |
| Duration of COVID-19-like illness, mean, days                                   |              |               |           |          |
| Mild/moderate symptoms                                                          |              | 5             |           |          |
| Severe symptoms                                                                 |              | 5             |           |          |
| Critical symptoms                                                               |              | 5             |           |          |
| Transmissions                                                                   |              |               |           |          |
| $R_e$                                                                           |              |               |           |          |
| Model validation and calibration                                                |              |               |           |          |
| March 15, 2020–March 20, 2020                                                   |              | 5.9           |           |          |
| March 21, 2020–March 31, 2020                                                   |              | 2.6           |           |          |
| April 1, 2020–April 10, 2020                                                    |              | 1.3           |           |          |
| April 11, 2020–May 1, 2020                                                      |              | 0.9           |           |          |

Abbreviations:  $R_e$ , Effective reproduction number<sup>a</sup> Those who progress to mild/moderate illness, first pass through the susceptible, latent, and asymptomatic health states.

Those who progress to severe illness first pass through the susceptible, latent, and asymptomatic and mild/moderate health states.

Those who progress to critical illness first pass through the susceptible, latent, and asymptomatic and mild/moderate health states.

**Supplementary Table 2.** Clinical and resource utilization outcomes for a model of COVID-19 disease and testing in Massachusetts, results per million

| Strategy                                                         | Incident infections, No. | Mortality, No. | PCR tests/simulation day, mean | PCR tests conducted, total | Hospital bed-days |       | ICU bed-days |       | Self-isolation days, total |
|------------------------------------------------------------------|--------------------------|----------------|--------------------------------|----------------------------|-------------------|-------|--------------|-------|----------------------------|
|                                                                  |                          |                |                                |                            | Cumulative        | Peak  | Cumulative   | Peak  |                            |
| <b>Optimistic scenario (June 1, 2020 <math>R_e</math> 0.9)</b>   |                          |                |                                |                            |                   |       |              |       |                            |
| PCR-severe-only                                                  | 246,000                  | 1,400          | 1,300                          | 226,900                    | 60,500            | 1,200 | 38,500       | 600   | -                          |
| Self-screen                                                      | 183,800                  | 1,100          | 1,300                          | 226,700                    | 53,400            | 1,200 | 32,500       | 500   | 1,605,900                  |
| PCR-any-symptom                                                  | 137,700                  | 1,000          | 2,100                          | 382,100                    | 45,700            | 1,200 | 28,500       | 500   | 799,200                    |
| PCR-all                                                          | 122,300                  | 900            | 15,300                         | 2,758,300                  | 43,600            | 1,200 | 26,800       | 500   | 876,000                    |
| PCR-all-repeat                                                   | 91,500                   | 800            | 83,800                         | 15,077,600                 | 38,500            | 1,200 | 24,100       | 500   | 1,035,200                  |
| <b>Intermediate scenario (June 1, 2020 <math>R_e</math> 1.3)</b> |                          |                |                                |                            |                   |       |              |       |                            |
| PCR-severe-only                                                  | 640,200                  | 2,800          | 1,300                          | 230,600                    | 107,800           | 1,200 | 64,600       | 600   | -                          |
| Self-screen                                                      | 424,400                  | 1,900          | 1,300                          | 228,500                    | 80,900            | 1,200 | 49,400       | 500   | 2,735,500                  |
| PCR-any-symptom                                                  | 263,200                  | 1,500          | 2,500                          | 449,200                    | 60,300            | 1,200 | 36,700       | 500   | 1,182,500                  |
| PCR-all                                                          | 236,700                  | 1,300          | 15,800                         | 2,838,800                  | 56,800            | 1,200 | 35,600       | 500   | 1,237,700                  |
| PCR-all-repeat                                                   | 129,800                  | 900            | 84,200                         | 15,150,900                 | 42,900            | 1,200 | 26,500       | 500   | 1,260,000                  |
| <b>Surging scenario (June 1, 2020 <math>R_e</math> 2.0)</b>      |                          |                |                                |                            |                   |       |              |       |                            |
| PCR-severe-only                                                  | 1,825,200                | 7,500          | 1,300                          | 239,800                    | 266,500           | 2,700 | 158,500      | 1,600 | -                          |
| Self-screen                                                      | 1,595,900                | 6,400          | 1,300                          | 237,700                    | 234,600           | 2,200 | 136,300      | 1,300 | 8,491,500                  |
| PCR-any-symptom                                                  | 1,272,700                | 5,200          | 5,500                          | 986,700                    | 177,700           | 1,600 | 103,000      | 900   | 4,178,500                  |
| PCR-all                                                          | 1,218,400                | 4,900          | 19,600                         | 3,522,800                  | 172,800           | 1,500 | 98,500       | 900   | 4,227,600                  |
| PCR-all-repeat                                                   | 536,400                  | 2,300          | 88,500                         | 15,925,300                 | 89,000            | 1,200 | 51,800       | 500   | 3,339,900                  |

Abbreviations: No., Number; PCR, Polymerase chain reaction;  $R_e$ , Effective reproduction number

Model-projected outcomes are presented for the 180-days between simulated days May 1, 2020 and November 1, 2020. PCR tests, hospital bed-days, ICU bed-days, and self-isolation days are rounded to the nearest 100. Cumulative self-isolation days are estimated in addition to the PCR-severe-only strategy.

**Supplementary Table 3.** One-way sensitivity analysis: PCR test sensitivity

| PCR test sensitivity                                          | Strategy        | Total life-years lost, No. <sup>a</sup> | Healthcare costs, \$ <sup>a</sup> | ICER, \$/QALY <sup>b</sup> |
|---------------------------------------------------------------|-----------------|-----------------------------------------|-----------------------------------|----------------------------|
| <b>Slowing scenario (June 1, 2020 R<sub>e</sub> 0.9)</b>      |                 |                                         |                                   |                            |
| 30%                                                           | PCR-any-symptom | 10,000                                  | 411,525,000                       | -                          |
|                                                               | Self-screen     | 8,200                                   | 428,461,000                       | 9,000                      |
|                                                               | PCR-severe-only | 10,100                                  | 492,552,000                       | dominated                  |
|                                                               | PCR-all         | 9,500                                   | 682,393,000                       | dominated                  |
|                                                               | PCR-all-repeat  | 8,700                                   | 2,138,507,000                     | dominated                  |
| 70% (Base case)                                               | PCR-any-symptom | 7,300                                   | 393,037,000                       | -                          |
|                                                               | Self-screen     | 8,200                                   | 428,461,000                       | dominated                  |
|                                                               | PCR-severe-only | 10,100                                  | 492,552,000                       | dominated                  |
|                                                               | PCR-all         | 6,700                                   | 654,741,000                       | 394,000                    |
|                                                               | PCR-all-repeat  | 5,800                                   | 2,071,400,000                     | 1,540,000                  |
| 100%                                                          | PCR-any-symptom | 5,600                                   | 364,723,000                       | -                          |
|                                                               | Self-screen     | 8,200                                   | 428,461,000                       | dominated                  |
|                                                               | PCR-severe-only | 10,100                                  | 492,552,000                       | dominated                  |
|                                                               | PCR-all         | 5,300                                   | 620,470,000                       | 796,000                    |
|                                                               | PCR-all-repeat  | 4,800                                   | 2,044,408,000                     | 2,787,000                  |
| <b>Intermediate scenario (June 1, 2020 R<sub>e</sub> 1.3)</b> |                 |                                         |                                   |                            |
| 30%                                                           | PCR-any-symptom | 17,700                                  | 615,508,000                       | -                          |
|                                                               | Self-screen     | 14,100                                  | 636,392,000                       | 6,000                      |
|                                                               | PCR-severe-only | 20,100                                  | 832,028,000                       | dominated                  |
|                                                               | PCR-all         | 16,700                                  | 907,022,000                       | dominated                  |
|                                                               | PCR-all-repeat  | 13,200                                  | 2,298,035,000                     | 1,765,000                  |
| 70% (Base case)                                               | PCR-any-symptom | 11,100                                  | 506,489,000                       | -                          |
|                                                               | Self-screen     | 14,100                                  | 636,392,000                       | dominated                  |
|                                                               | PCR-all         | 9,700                                   | 768,358,000                       | 181,000                    |
|                                                               | PCR-severe-only | 20,100                                  | 832,028,000                       | dominated                  |
|                                                               | PCR-all-repeat  | 6,800                                   | 2,111,387,000                     | 468,000                    |
| 100%                                                          | PCR-any-symptom | 7,200                                   | 434,448,000                       | -                          |
|                                                               | Self-screen     | 14,100                                  | 636,392,000                       | dominated                  |
|                                                               | PCR-all         | 6,700                                   | 684,401,000                       | 482,000                    |
|                                                               | PCR-severe-only | 20,100                                  | 832,028,000                       | dominated                  |
|                                                               | PCR-all-repeat  | 5,100                                   | 2,058,743,000                     | 844,000                    |

**Supplementary Table 3.** One-way sensitivity analysis: PCR test sensitivity (continued)

| PCR test sensitivity                                     | Strategy        | Total life-years lost, No. <sup>a</sup> | Healthcare costs, \$ <sup>a</sup> | ICER, \$/QALY <sup>b</sup> |
|----------------------------------------------------------|-----------------|-----------------------------------------|-----------------------------------|----------------------------|
| <b>Surging scenario (June 1, 2020 R<sub>e</sub> 2.0)</b> |                 |                                         |                                   |                            |
| 30%                                                      | PCR-any-symptom | 57,100                                  | 1,672,249,000                     | -                          |
|                                                          | Self-screen     | 46,500                                  | 1,753,092,000                     | 8,000                      |
|                                                          | PCR-all         | 55,900                                  | 1,983,677,000                     | dominated                  |
|                                                          | PCR-severe-only | 55,000                                  | 2,010,507,000                     | dominated                  |
|                                                          | PCR-all-repeat  | 45,400                                  | 3,389,170,000                     | 1,455,000                  |
| 70% (Base case)                                          | PCR-any-symptom | 37,600                                  | 1,421,427,000                     | -                          |
|                                                          | PCR-all         | 36,000                                  | 1,673,911,000                     | dominated                  |
|                                                          | Self-screen     | 46,500                                  | 1,753,092,000                     | dominated                  |
|                                                          | PCR-severe-only | 55,000                                  | 2,010,507,000                     | dominated                  |
|                                                          | PCR-all-repeat  | 16,600                                  | 2,532,432,000                     | 53,000                     |
| 100%                                                     | PCR-any-symptom | 22,800                                  | 1,106,651,000                     | -                          |
|                                                          | PCR-all         | 21,600                                  | 1,283,524,000                     | dominated                  |
|                                                          | Self-screen     | 46,500                                  | 1,753,092,000                     | dominated                  |
|                                                          | PCR-severe-only | 55,000                                  | 2,010,507,000                     | dominated                  |
|                                                          | PCR-all-repeat  | 7,700                                   | 2,182,207,000                     | 71,000                     |

Abbreviations: No., Number; PCR, Polymerase chain reaction; R<sub>e</sub>, Effective reproduction number; \$, US dollars; ICER, Incremental cost-effectiveness ratio; QALY, Quality-adjusted life-years

<sup>a</sup> Life-years lost are rounded to the nearest 100. Costs are rounded to the nearest 1,000.

<sup>b</sup> Incremental cost effectiveness ratios are calculated by dividing the difference in total life-years lost by the difference in total healthcare-related costs compared to the next most expensive strategy. Dominated strategies are either more expensive and less effective (strong dominance) or more expensive and more effective but a less efficient than a subsequent strategy (weak dominance). Strategies are listed in order of increasing cost as per cost-effectiveness analysis convention.

**Supplementary Table 4.** One-way sensitivity analysis: probability of test acceptance

| Probability of test acceptance                                | Strategy        | Total life-years lost, No. <sup>a</sup> | Healthcare costs, \$ <sup>a</sup> | ICER, \$/QALY <sup>b</sup> |
|---------------------------------------------------------------|-----------------|-----------------------------------------|-----------------------------------|----------------------------|
| <b>Slowing scenario (June 1, 2020 R<sub>e</sub> 0.9)</b>      |                 |                                         |                                   |                            |
| 15%                                                           | PCR-any-symptom | 9,900                                   | 436,988,000                       | -                          |
|                                                               | Self-screen     | 9,700                                   | 459,399,000                       | dominated                  |
|                                                               | PCR-all         | 9,100                                   | 491,224,000                       | 69,000                     |
|                                                               | PCR-severe-only | 10,100                                  | 492,552,000                       | dominated                  |
|                                                               | PCR-all-repeat  | 8,900                                   | 753,288,000                       | 1,056,000                  |
| 80% (Base case)                                               | PCR-any-symptom | 7,300                                   | 393,037,000                       | -                          |
|                                                               | Self-screen     | 8,200                                   | 428,461,000                       | dominated                  |
|                                                               | PCR-severe-only | 10,100                                  | 492,552,000                       | dominated                  |
|                                                               | PCR-all         | 6,700                                   | 654,741,000                       | 394,000                    |
|                                                               | PCR-all-repeat  | 5,800                                   | 2,071,400,000                     | 1,540,000                  |
| 100%                                                          | PCR-any-symptom | 7,200                                   | 367,159,000                       | -                          |
|                                                               | Self-screen     | 8,200                                   | 401,933,000                       | dominated                  |
|                                                               | PCR-severe-only | 10,100                                  | 492,552,000                       | dominated                  |
|                                                               | PCR-all         | 6,700                                   | 688,327,000                       | 667,000                    |
|                                                               | PCR-all-repeat  | 5,800                                   | 2,498,184,000                     | 1,952,000                  |
| <b>Intermediate scenario (June 1, 2020 R<sub>e</sub> 1.3)</b> |                 |                                         |                                   |                            |
| 15%                                                           | PCR-any-symptom | 17,800                                  | 724,979,000                       | -                          |
|                                                               | PCR-all         | 15,600                                  | 744,306,000                       | 9,000                      |
|                                                               | Self-screen     | 19,100                                  | 759,127,000                       | dominated                  |
|                                                               | PCR-severe-only | 20,100                                  | 832,028,000                       | dominated                  |
|                                                               | PCR-all-repeat  | 15,100                                  | 975,257,000                       | 433,000                    |
| 80% (Base case)                                               | PCR-any-symptom | 11,100                                  | 506,489,000                       | -                          |
|                                                               | Self-screen     | 14,100                                  | 636,392,000                       | dominated                  |
|                                                               | PCR-all         | 9,700                                   | 768,358,000                       | 181,000                    |
|                                                               | PCR-severe-only | 20,100                                  | 832,028,000                       | dominated                  |
|                                                               | PCR-all-repeat  | 6,800                                   | 2,111,387,000                     | 468,000                    |
| 100%                                                          | PCR-any-symptom | 9,700                                   | 451,087,000                       | -                          |
|                                                               | Self-screen     | 13,700                                  | 590,578,000                       | dominated                  |
|                                                               | PCR-all         | 8,900                                   | 769,693,000                       | 397,000                    |
|                                                               | PCR-severe-only | 20,100                                  | 832,028,000                       | dominated                  |
|                                                               | PCR-all-repeat  | 6,500                                   | 2,524,022,000                     | 735,000                    |



**Supplementary Table 4.** One-way sensitivity analysis: probability of test acceptance (continued)

| Probability of test acceptance                           | Strategy        | Total life-years lost, No. <sup>a</sup> | Healthcare costs, \$ <sup>a</sup> | ICER, \$/QALY <sup>b</sup> |
|----------------------------------------------------------|-----------------|-----------------------------------------|-----------------------------------|----------------------------|
| <b>Surging scenario (June 1, 2020 R<sub>e</sub> 2.0)</b> |                 |                                         |                                   |                            |
| 15%                                                      | PCR-all         | 48,700                                  | 1,900,970,000                     | -                          |
|                                                          | PCR-any-symptom | 52,600                                  | 1,954,317,000                     | dominated                  |
|                                                          | Self-screen     | 53,400                                  | 1,979,727,000                     | dominated                  |
|                                                          | PCR-severe-only | 55,000                                  | 2,010,507,000                     | dominated                  |
|                                                          | PCR-all-repeat  | 46,700                                  | 2,122,844,000                     | 112,000                    |
| 80% (Base case)                                          | PCR-any-symptom | 37,600                                  | 1,421,427,000                     | -                          |
|                                                          | PCR-all         | 36,000                                  | 1,673,911,000                     | dominated                  |
|                                                          | Self-screen     | 46,500                                  | 1,753,092,000                     | dominated                  |
|                                                          | PCR-severe-only | 55,000                                  | 2,010,507,000                     | dominated                  |
|                                                          | PCR-all-repeat  | 16,600                                  | 2,532,432,000                     | 53,000                     |
| 100%                                                     | PCR-any-symptom | 31,800                                  | 1,202,513,000                     | -                          |
|                                                          | PCR-all         | 31,300                                  | 1,508,234,000                     | dominated                  |
|                                                          | Self-screen     | 44,500                                  | 1,636,131,000                     | dominated                  |
|                                                          | PCR-severe-only | 55,000                                  | 2,010,507,000                     | dominated                  |
|                                                          | PCR-all-repeat  | 13,100                                  | 2,813,003,000                     | 86,000                     |

Abbreviations: PCR, Polymerase chain reaction; R<sub>e</sub>, Effective reproduction number; \$, US dollars; ICER, Incremental cost-effectiveness ratio; QALY, Quality-adjusted life-years

<sup>a</sup> Life-years lost are rounded to the nearest 100. Costs are rounded to the nearest 1,000.

<sup>b</sup> Incremental cost effectiveness ratios are calculated by dividing the difference in total life-years lost by the difference in total healthcare-related costs compared to the next most expensive strategy. Dominated strategies are either more expensive and less effective (strong dominance) or more expensive and more effective but a less efficient than a subsequent strategy (weak dominance). Strategies are listed in order of increasing cost as per cost-effectiveness analysis convention.

**Supplementary Table 5.** One-way sensitivity analysis: transmission reduction after a positive PCR test result

| Transmission reduction after a positive PCR test result       | Strategy        | Total life-years lost, No. <sup>a</sup> | Healthcare costs, \$ <sup>a</sup> | ICER, \$/QALY <sup>b</sup> |
|---------------------------------------------------------------|-----------------|-----------------------------------------|-----------------------------------|----------------------------|
| <b>Slowing scenario (June 1, 2020 R<sub>e</sub> 0.9)</b>      |                 |                                         |                                   |                            |
| 33%                                                           | PCR-any-symptom | 8,500                                   | 421,061,000                       | -                          |
|                                                               | PCR-severe-only | 9,100                                   | 441,061,000                       | dominated                  |
|                                                               | Self-screen     | 10,300                                  | 470,241,000                       | dominated                  |
|                                                               | PCR-all         | 8,700                                   | 705,742,000                       | dominated                  |
|                                                               | PCR-all-repeat  | 7,600                                   | 2,152,299,000                     | 1,944,000                  |
| 65% (Base case)                                               | PCR-any-symptom | 7,300                                   | 393,037,000                       | -                          |
|                                                               | Self-screen     | 8,200                                   | 428,461,000                       | dominated                  |
|                                                               | PCR-severe-only | 10,100                                  | 492,552,000                       | dominated                  |
|                                                               | PCR-all         | 6,700                                   | 654,741,000                       | 394,000                    |
|                                                               | PCR-all-repeat  | 5,800                                   | 2,071,400,000                     | 1,540,000                  |
| 100%                                                          | PCR-any-symptom | 6,500                                   | 347,653,000                       | -                          |
|                                                               | Self-screen     | 7,200                                   | 373,539,000                       | dominated                  |
|                                                               | PCR-severe-only | 9,100                                   | 441,061,000                       | dominated                  |
|                                                               | PCR-all         | 5,700                                   | 601,207,000                       | 292,000                    |
|                                                               | PCR-all-repeat  | 5,000                                   | 2,025,288,000                     | 2,168,000                  |
| <b>Intermediate scenario (June 1, 2020 R<sub>e</sub> 1.3)</b> |                 |                                         |                                   |                            |
| 33%                                                           | PCR-any-symptom | 14,700                                  | 643,452,000                       | -                          |
|                                                               | PCR-severe-only | 16,200                                  | 695,062,000                       | dominated                  |
|                                                               | Self-screen     | 19,900                                  | 810,658,000                       | dominated                  |
|                                                               | PCR-all         | 14,700                                  | 911,003,000                       | dominated                  |
|                                                               | PCR-all-repeat  | 11,000                                  | 2,297,888,000                     | 447,000                    |
| 65% (Base case)                                               | PCR-any-symptom | 11,100                                  | 506,489,000                       | -                          |
|                                                               | Self-screen     | 14,100                                  | 636,392,000                       | dominated                  |
|                                                               | PCR-all         | 9,700                                   | 768,358,000                       | 181,000                    |
|                                                               | PCR-severe-only | 20,100                                  | 832,028,000                       | dominated                  |
|                                                               | PCR-all-repeat  | 6,800                                   | 2,111,387,000                     | 468,000                    |
| 100%                                                          | PCR-any-symptom | 8,000                                   | 404,249,000                       | -                          |
|                                                               | Self-screen     | 10,700                                  | 490,688,000                       | dominated                  |
|                                                               | PCR-all         | 6,700                                   | 645,776,000                       | 188,000                    |
|                                                               | PCR-severe-only | 16,200                                  | 695,062,000                       | dominated                  |
|                                                               | PCR-all-repeat  | 5,200                                   | 2,037,436,000                     | 935,000                    |

**Supplementary Table 5.** One-way sensitivity analysis: transmission reduction after a positive PCR test result (continued)

| Transmission reduction after a positive PCR test result  | Strategy        | Total life-years lost, No. <sup>a</sup> | Healthcare costs, \$ <sup>a</sup> | ICER, \$/QALY <sup>b</sup> |
|----------------------------------------------------------|-----------------|-----------------------------------------|-----------------------------------|----------------------------|
| <b>Surging scenario (June 1, 2020 R<sub>e</sub> 2.0)</b> |                 |                                         |                                   |                            |
| 33%                                                      | PCR-any-symptom | 47,600                                  | 1,775,535,000                     | -                          |
|                                                          | PCR-severe-only | 49,900                                  | 1,845,785,000                     | dominated                  |
|                                                          | Self-screen     | 53,900                                  | 1,999,246,000                     | dominated                  |
|                                                          | PCR-all         | 47,500                                  | 2,055,836,000                     | dominated                  |
|                                                          | PCR-all-repeat  | 37,400                                  | 3,386,787,000                     | 158,000                    |
| 65% (Base case)                                          | PCR-any-symptom | 37,600                                  | 1,421,427,000                     | -                          |
|                                                          | PCR-all         | 36,000                                  | 1,673,911,000                     | dominated                  |
|                                                          | Self-screen     | 46,500                                  | 1,753,092,000                     | dominated                  |
|                                                          | PCR-severe-only | 55,000                                  | 2,010,507,000                     | dominated                  |
|                                                          | PCR-all-repeat  | 16,600                                  | 2,532,432,000                     | 53,000                     |
| 100%                                                     | PCR-any-symptom | 23,900                                  | 949,753,000                       | -                          |
|                                                          | PCR-all         | 20,000                                  | 1,105,802,000                     | 40,000                     |
|                                                          | Self-screen     | 36,800                                  | 1,348,219,000                     | dominated                  |
|                                                          | PCR-severe-only | 49,900                                  | 1,845,785,000                     | dominated                  |
|                                                          | PCR-all-repeat  | 6,500                                   | 2,093,001,000                     | 73,000                     |

Abbreviations: No., Number; PCR, Polymerase chain reaction; R<sub>e</sub>, Effective reproduction number; \$, US dollars; ICER, Incremental cost-effectiveness ratio; QALY, Quality-adjusted life-years

<sup>a</sup> Life-years lost are rounded to the nearest 100. Costs are rounded to the nearest 1,000.

<sup>b</sup> Incremental cost effectiveness ratios are calculated by dividing the difference in total life-years lost by the difference in total healthcare-related costs compared to the next most expensive strategy. Dominated strategies are either more expensive and less effective (strong dominance) or more expensive and more effective but a less efficient than a subsequent strategy (weak dominance). Strategies are listed in order of increasing cost as per cost-effectiveness analysis convention.

**Supplementary Table 6.** One-way sensitivity analysis: percent of people with severe disease presenting to hospital

| Number of severe disease presentations to hospital            | Strategy        | Total life-years lost, No. <sup>a</sup> | Healthcare costs, \$ <sup>a</sup> | ICER, \$/QALY <sup>b</sup> |
|---------------------------------------------------------------|-----------------|-----------------------------------------|-----------------------------------|----------------------------|
| <b>Slowing scenario (June 1, 2020 R<sub>e</sub> 0.9)</b>      |                 |                                         |                                   |                            |
| 50%                                                           | PCR-any-symptom | 10,000                                  | 298,716,000                       | -                          |
|                                                               | Self-screen     | 12,900                                  | 299,028,000                       | dominated                  |
|                                                               | PCR-severe-only | 15,700                                  | 332,235,000                       | dominated                  |
|                                                               | PCR-all         | 9,800                                   | 577,967,000                       | dominated                  |
|                                                               | PCR-all-repeat  | 8,700                                   | 1,991,091,000                     | 1,317,000                  |
| 80% (Base case)                                               | PCR-any-symptom | 7,300                                   | 393,037,000                       | -                          |
|                                                               | Self-screen     | 8,200                                   | 428,461,000                       | dominated                  |
|                                                               | PCR-severe-only | 10,100                                  | 492,552,000                       | dominated                  |
|                                                               | PCR-all         | 6,700                                   | 654,741,000                       | 394,000                    |
|                                                               | PCR-all-repeat  | 5,800                                   | 2,071,400,000                     | 1,540,000                  |
| 100%                                                          | PCR-any-symptom | 5,700                                   | 440,307,000                       | -                          |
|                                                               | Self-screen     | 5,800                                   | 498,864,000                       | dominated                  |
|                                                               | PCR-severe-only | 6,700                                   | 559,875,000                       | dominated                  |
|                                                               | PCR-all         | 5,300                                   | 702,901,000                       | 620,000                    |
|                                                               | PCR-all-repeat  | 4,400                                   | 2,124,859,000                     | 1,584,000                  |
| <b>Intermediate scenario (June 1, 2020 R<sub>e</sub> 1.3)</b> |                 |                                         |                                   |                            |
| 50%                                                           | PCR-any-symptom | 14,200                                  | 372,635,000                       | -                          |
|                                                               | Self-screen     | 21,700                                  | 433,489,000                       | dominated                  |
|                                                               | PCR-severe-only | 30,000                                  | 537,170,000                       | dominated                  |
|                                                               | PCR-all         | 13,800                                  | 646,906,000                       | dominated                  |
|                                                               | PCR-all-repeat  | 9,900                                   | 2,026,449,000                     | 387,000                    |
| 80% (Base case)                                               | PCR-any-symptom | 11,100                                  | 506,489,000                       | -                          |
|                                                               | Self-screen     | 14,100                                  | 636,392,000                       | dominated                  |
|                                                               | PCR-all         | 9,700                                   | 768,358,000                       | 181,000                    |
|                                                               | PCR-severe-only | 20,100                                  | 832,028,000                       | dominated                  |
|                                                               | PCR-all-repeat  | 6,800                                   | 2,111,387,000                     | 468,000                    |
| 100%                                                          | PCR-any-symptom | 8,300                                   | 575,575,000                       | -                          |
|                                                               | Self-screen     | 9,400                                   | 756,588,000                       | dominated                  |
|                                                               | PCR-all         | 7,200                                   | 824,862,000                       | 229,000                    |
|                                                               | PCR-severe-only | 13,300                                  | 962,465,000                       | dominated                  |
|                                                               | PCR-all-repeat  | 4,900                                   | 2,173,536,000                     | 581,000                    |

**Supplementary Table 6.** One-way sensitivity analysis: percent of people with severe disease presenting to hospital (continued)

| Number of severe disease presentations to hospital       | Strategy        | Total life-years lost, No. <sup>a</sup> | Healthcare costs, \$ <sup>a</sup> | ICER, \$/QALY <sup>b</sup> |
|----------------------------------------------------------|-----------------|-----------------------------------------|-----------------------------------|----------------------------|
| <b>Surging scenario (June 1, 2020 R<sub>e</sub> 2.0)</b> |                 |                                         |                                   |                            |
| 50%                                                      | PCR-any-symptom | 51,600                                  | 1,015,751,000                     | -                          |
|                                                          | Self-screen     | 72,100                                  | 1,119,555,000                     | dominated                  |
|                                                          | PCR-severe-only | 82,400                                  | 1,285,021,000                     | dominated                  |
|                                                          | PCR-all         | 50,300                                  | 1,296,937,000                     | dominated                  |
|                                                          | PCR-all-repeat  | 23,900                                  | 2,324,640,000                     | 47,000                     |
| 80% (Base case)                                          | PCR-any-symptom | 37,600                                  | 1,421,427,000                     | -                          |
|                                                          | PCR-all         | 36,000                                  | 1,673,911,000                     | dominated                  |
|                                                          | Self-screen     | 46,500                                  | 1,753,092,000                     | dominated                  |
|                                                          | PCR-severe-only | 55,000                                  | 2,010,507,000                     | dominated                  |
|                                                          | PCR-all-repeat  | 16,600                                  | 2,532,432,000                     | 53,000                     |
| 100%                                                     | PCR-any-symptom | 28,000                                  | 1,684,293,000                     | -                          |
|                                                          | PCR-all         | 26,100                                  | 1,877,432,000                     | dominated                  |
|                                                          | Self-screen     | 31,100                                  | 2,174,489,000                     | dominated                  |
|                                                          | PCR-severe-only | 36,200                                  | 2,473,379,000                     | dominated                  |
|                                                          | PCR-all-repeat  | 11,500                                  | 2,643,654,000                     | 58,000                     |

Abbreviations: No., Number; PCR, Polymerase chain reaction; R<sub>e</sub>, Effective reproduction number; \$, US dollars; ICER, Incremental cost-effectiveness ratio; QALY, Quality-adjusted life-years

<sup>a</sup> Life-years lost are rounded to the nearest 100. Costs are rounded to the nearest 1,000.

<sup>b</sup> Incremental cost effectiveness ratios are calculated by dividing the difference in total life-years lost by the difference in total healthcare-related costs compared to the next most expensive strategy. Dominated strategies are either more expensive and less effective (strong dominance) or more expensive and more effective but a less efficient than a subsequent strategy (weak dominance). Strategies are listed in order of increasing cost as per cost-effectiveness analysis convention.

**Supplementary Table 7.** One-way sensitivity analysis: probability of surviving an intensive care unit admission

| Probability of ICU survival                                   | Strategy        | Total life-years lost, No. <sup>a</sup> | Healthcare costs, \$ <sup>a</sup> | ICER, \$/QALY <sup>b</sup> |
|---------------------------------------------------------------|-----------------|-----------------------------------------|-----------------------------------|----------------------------|
| <b>Slowing scenario (June 1, 2020 R<sub>e</sub> 0.9)</b>      |                 |                                         |                                   |                            |
| 20%                                                           | PCR-any-symptom | 11,100                                  | 525,880,000                       | -                          |
|                                                               | Self-screen     | 13,900                                  | 558,077,000                       | dominated                  |
|                                                               | PCR-severe-only | 15,800                                  | 639,645,000                       | dominated                  |
|                                                               | PCR-all         | 10,500                                  | 783,218,000                       | 446,000                    |
|                                                               | PCR-all-repeat  | 9,300                                   | 2,204,169,000                     | 1,145,000                  |
| 40% (Base case)                                               | PCR-any-symptom | 7,300                                   | 393,037,000                       | -                          |
|                                                               | Self-screen     | 8,200                                   | 428,461,000                       | dominated                  |
|                                                               | PCR-severe-only | 10,100                                  | 492,552,000                       | dominated                  |
|                                                               | PCR-all         | 6,700                                   | 654,741,000                       | 394,000                    |
|                                                               | PCR-all-repeat  | 5,800                                   | 2,071,400,000                     | 1,540,000                  |
| 80%                                                           | PCR-any-symptom | 5,700                                   | 354,902,000                       | -                          |
|                                                               | Self-screen     | 6,200                                   | 387,986,000                       | dominated                  |
|                                                               | PCR-severe-only | 7,500                                   | 422,140,000                       | dominated                  |
|                                                               | PCR-all         | 5,100                                   | 626,647,000                       | 409,000                    |
|                                                               | PCR-all-repeat  | 4,300                                   | 2,034,145,000                     | 1,928,000                  |
| <b>Intermediate scenario (June 1, 2020 R<sub>e</sub> 1.3)</b> |                 |                                         |                                   |                            |
| 20%                                                           | PCR-any-symptom | 15,600                                  | 654,937,000                       | -                          |
|                                                               | Self-screen     | 22,400                                  | 790,654,000                       | dominated                  |
|                                                               | PCR-all         | 15,000                                  | 883,490,000                       | dominated                  |
|                                                               | PCR-severe-only | 29,600                                  | 988,997,000                       | dominated                  |
|                                                               | PCR-all-repeat  | 11,200                                  | 2,263,925,000                     | 367,000                    |
| 40% (Base case)                                               | PCR-any-symptom | 11,100                                  | 506,489,000                       | -                          |
|                                                               | Self-screen     | 14,100                                  | 636,392,000                       | dominated                  |
|                                                               | PCR-all         | 9,700                                   | 768,358,000                       | 181,000                    |
|                                                               | PCR-severe-only | 20,100                                  | 832,028,000                       | dominated                  |
|                                                               | PCR-all-repeat  | 6,800                                   | 2,111,387,000                     | 468,000                    |
| 80%                                                           | PCR-any-symptom | 8,700                                   | 470,461,000                       | -                          |
|                                                               | Self-screen     | 10,800                                  | 579,369,000                       | dominated                  |
|                                                               | PCR-all         | 7,300                                   | 720,416,000                       | 179,000                    |
|                                                               | PCR-severe-only | 15,100                                  | 752,231,000                       | dominated                  |
|                                                               | PCR-all-repeat  | 5,300                                   | 2,074,658,000                     | 670,000                    |

**Supplementary Table 7.** One-way sensitivity analysis: probability of surviving an intensive care unit admission (continued)

| Probability of ICU survival                              | Strategy        | Total life-years lost, No. <sup>a</sup> | Healthcare costs, \$ <sup>a</sup> | ICER, \$/QALY <sup>b</sup> |
|----------------------------------------------------------|-----------------|-----------------------------------------|-----------------------------------|----------------------------|
| <b>Surging scenario (June 1, 2020 R<sub>e</sub> 2.0)</b> |                 |                                         |                                   |                            |
| 20%                                                      | PCR-any-symptom | 53,300                                  | 1,664,966,000                     | -                          |
|                                                          | PCR-all         | 50,900                                  | 1,839,231,000                     | dominated                  |
|                                                          | Self-screen     | 69,400                                  | 2,015,926,000                     | dominated                  |
|                                                          | PCR-severe-only | 79,600                                  | 2,389,770,000                     | dominated                  |
|                                                          | PCR-all-repeat  | 24,600                                  | 2,694,990,000                     | 36,000                     |
| 40% (Base case)                                          | PCR-any-symptom | 37,600                                  | 1,421,427,000                     | -                          |
|                                                          | PCR-all         | 36,000                                  | 1,673,911,000                     | dominated                  |
|                                                          | Self-screen     | 46,500                                  | 1,753,092,000                     | dominated                  |
|                                                          | PCR-severe-only | 55,000                                  | 2,010,507,000                     | dominated                  |
|                                                          | PCR-all-repeat  | 16,600                                  | 2,532,432,000                     | 53,000                     |
| 80%                                                      | PCR-any-symptom | 29,700                                  | 1,326,919,000                     | -                          |
|                                                          | PCR-all         | 27,700                                  | 1,572,729,000                     | dominated                  |
|                                                          | Self-screen     | 35,900                                  | 1,619,166,000                     | dominated                  |
|                                                          | PCR-severe-only | 42,800                                  | 1,897,369,000                     | dominated                  |
|                                                          | PCR-all-repeat  | 12,900                                  | 2,474,891,000                     | 68,000                     |

Abbreviations: No., Number; PCR, Polymerase chain reaction; R<sub>e</sub>, Effective reproduction number; ICU, Intensive care unit; \$, US dollars; ICER, Incremental cost-effectiveness ratio; QALY, Quality-adjusted life-years

<sup>a</sup> Life-years lost are rounded to the nearest 100. Costs are rounded to the nearest 1,000.

<sup>b</sup> Incremental cost effectiveness ratios are calculated by dividing the difference in total life-years lost by the difference in total healthcare-related costs compared to the next most expensive strategy. Dominated strategies are either more expensive and less effective (strong dominance) or more expensive and more effective but a less efficient than a subsequent strategy (weak dominance). Strategies are listed in order of increasing cost as per cost-effectiveness analysis convention.

**Supplementary Table 8.** One-way sensitivity analysis: PCR test cost

| PCR test cost                                            | Strategy        | Total life-years lost, No. <sup>a</sup> | Healthcare costs, \$ <sup>a</sup> | ICER, \$/QALY <sup>b</sup> |
|----------------------------------------------------------|-----------------|-----------------------------------------|-----------------------------------|----------------------------|
| <b>Slowing scenario (June 1, 2020 R<sub>e</sub> 0.9)</b> |                 |                                         |                                   |                            |
| \$3                                                      | PCR-all         | 6,700                                   | 345,849,000                       | -                          |
|                                                          | PCR-any-symptom | 7,300                                   | 350,249,000                       | dominated                  |
|                                                          | PCR-all-repeat  | 5,800                                   | 382,881,000                       | 40,000                     |
|                                                          | Self-screen     | 8,200                                   | 403,075,000                       | dominated                  |
|                                                          | PCR-severe-only | 10,100                                  | 467,144,000                       | dominated                  |
| \$5                                                      | PCR-any-symptom | 7,300                                   | 352,496,000                       | -                          |
|                                                          | PCR-all         | 6,700                                   | 362,073,000                       | 14,000                     |
|                                                          | Self-screen     | 8,200                                   | 404,409,000                       | dominated                  |
|                                                          | PCR-severe-only | 10,100                                  | 468,478,000                       | dominated                  |
|                                                          | PCR-all-repeat  | 5,800                                   | 471,568,000                       | 119,000                    |
| \$13                                                     | PCR-any-symptom | 7,300                                   | 359,256,000                       | -                          |
|                                                          | Self-screen     | 8,200                                   | 408,419,000                       | dominated                  |
|                                                          | PCR-all         | 6,700                                   | 410,872,000                       | 78,000                     |
|                                                          | PCR-severe-only | 10,100                                  | 472,492,000                       | dominated                  |
|                                                          | PCR-all-repeat  | 5,800                                   | 738,323,000                       | 356,000                    |
| \$26                                                     | PCR-any-symptom | 7,300                                   | 370,519,000                       | -                          |
|                                                          | Self-screen     | 8,200                                   | 415,101,000                       | dominated                  |
|                                                          | PCR-severe-only | 10,100                                  | 479,180,000                       | dominated                  |
|                                                          | PCR-all         | 6,700                                   | 492,183,000                       | 183,000                    |
|                                                          | PCR-all-repeat  | 5,800                                   | 1,182,797,000                     | 751,000                    |
| \$51 (Base case)                                         | PCR-any-symptom | 7,300                                   | 393,037,000                       | -                          |
|                                                          | Self-screen     | 8,200                                   | 428,461,000                       | dominated                  |
|                                                          | PCR-severe-only | 10,100                                  | 492,552,000                       | dominated                  |
|                                                          | PCR-all         | 6,700                                   | 654,741,000                       | 394,000                    |
|                                                          | PCR-all-repeat  | 5,800                                   | 2,071,400,000                     | 1,540,000                  |
| \$103                                                    | PCR-any-symptom | 7,300                                   | 438,081,000                       | -                          |
|                                                          | Self-screen     | 8,200                                   | 455,185,000                       | dominated                  |
|                                                          | PCR-severe-only | 10,100                                  | 519,299,000                       | dominated                  |
|                                                          | PCR-all         | 6,700                                   | 979,920,000                       | 816,000                    |
|                                                          | PCR-all-repeat  | 5,800                                   | 3,848,953,000                     | 3,119,000                  |



**Supplementary Table 8.** One-way sensitivity analysis: PCR test cost (continued)

| PCR test cost                                                 | Strategy        | Total life-years lost, No. <sup>a</sup> | Healthcare costs, \$ <sup>a</sup> | ICER, \$/QALY <sup>b</sup> |
|---------------------------------------------------------------|-----------------|-----------------------------------------|-----------------------------------|----------------------------|
| <b>Intermediate scenario (June 1, 2020 R<sub>e</sub> 1.3)</b> |                 |                                         |                                   |                            |
| \$3                                                           | PCR-all-repeat  | 6,800                                   | 414,669,000                       | -                          |
|                                                               | PCR-all         | 9,700                                   | 450,441,000                       | dominated                  |
|                                                               | PCR-any-symptom | 11,100                                  | 456,183,000                       | dominated                  |
|                                                               | Self-screen     | 14,100                                  | 610,806,000                       | dominated                  |
|                                                               | PCR-severe-only | 20,100                                  | 806,205,000                       | dominated                  |
| \$5                                                           | PCR-any-symptom | 11,100                                  | 458,825,000                       | -                          |
|                                                               | PCR-all         | 9,700                                   | 467,139,000                       | 6,000                      |
|                                                               | PCR-all-repeat  | 6,800                                   | 503,786,000                       | 13,000                     |
|                                                               | Self-screen     | 14,100                                  | 612,149,000                       | dominated                  |
|                                                               | PCR-severe-only | 20,100                                  | 807,562,000                       | dominated                  |
| \$13                                                          | PCR-any-symptom | 11,100                                  | 466,773,000                       | -                          |
|                                                               | PCR-all         | 9,700                                   | 517,364,000                       | 35,000                     |
|                                                               | Self-screen     | 14,100                                  | 616,192,000                       | dominated                  |
|                                                               | PCR-all-repeat  | 6,800                                   | 771,836,000                       | 89,000                     |
|                                                               | PCR-severe-only | 20,100                                  | 811,641,000                       | dominated                  |
| \$26                                                          | PCR-any-symptom | 11,100                                  | 480,015,000                       | -                          |
|                                                               | PCR-all         | 9,700                                   | 601,050,000                       | 84,000                     |
|                                                               | Self-screen     | 14,100                                  | 622,927,000                       | dominated                  |
|                                                               | PCR-severe-only | 20,100                                  | 818,439,000                       | dominated                  |
|                                                               | PCR-all-repeat  | 6,800                                   | 1,218,469,000                     | 215,000                    |
| \$51 (Base case)                                              | PCR-any-symptom | 11,100                                  | 506,489,000                       | -                          |
|                                                               | Self-screen     | 14,100                                  | 636,392,000                       | dominated                  |
|                                                               | PCR-all         | 9,700                                   | 768,358,000                       | 181,000                    |
|                                                               | PCR-severe-only | 20,100                                  | 832,028,000                       | dominated                  |
|                                                               | PCR-all-repeat  | 6,800                                   | 2,111,387,000                     | 468,000                    |
| \$103                                                         | PCR-any-symptom | 11,100                                  | 559,449,000                       | -                          |
|                                                               | Self-screen     | 14,100                                  | 663,327,000                       | dominated                  |
|                                                               | PCR-severe-only | 20,100                                  | 859,213,000                       | dominated                  |
|                                                               | PCR-all         | 9,700                                   | 1,103,038,000                     | 376,000                    |
|                                                               | PCR-all-repeat  | 6,800                                   | 3,897,571,000                     | 974,000                    |

**Supplementary Table 8.** One-way sensitivity analysis: PCR test cost (continued)

| PCR test cost                                            | Strategy        | Total life-years lost, No. <sup>a</sup> | Healthcare costs, \$ <sup>a</sup> | ICER, \$/QALY <sup>b</sup> |
|----------------------------------------------------------|-----------------|-----------------------------------------|-----------------------------------|----------------------------|
| <b>Surging scenario (June 1, 2020 R<sub>e</sub> 2.0)</b> |                 |                                         |                                   |                            |
| \$3                                                      | PCR-all-repeat  | 16,600                                  | 748,987,000                       | -                          |
|                                                          | PCR-all         | 36,000                                  | 1,279,395,000                     | dominated                  |
|                                                          | PCR-any-symptom | 37,600                                  | 1,310,926,000                     | dominated                  |
|                                                          | Self-screen     | 46,500                                  | 1,726,475,000                     | dominated                  |
|                                                          | PCR-severe-only | 55,000                                  | 1,983,651,000                     | dominated                  |
| \$5                                                      | PCR-all-repeat  | 16,600                                  | 842,660,000                       | -                          |
|                                                          | PCR-all         | 36,000                                  | 1,300,116,000                     | dominated                  |
|                                                          | PCR-any-symptom | 37,600                                  | 1,316,730,000                     | dominated                  |
|                                                          | Self-screen     | 46,500                                  | 1,727,873,000                     | dominated                  |
|                                                          | PCR-severe-only | 55,000                                  | 1,985,062,000                     | dominated                  |
| \$13                                                     | PCR-all-repeat  | 16,600                                  | 1,124,411,000                     | -                          |
|                                                          | PCR-any-symptom | 37,600                                  | 1,334,187,000                     | dominated                  |
|                                                          | PCR-all         | 36,000                                  | 1,362,442,000                     | dominated                  |
|                                                          | Self-screen     | 46,500                                  | 1,732,078,000                     | dominated                  |
|                                                          | PCR-severe-only | 55,000                                  | 1,989,304,000                     | dominated                  |
| \$26                                                     | PCR-any-symptom | 37,600                                  | 1,363,275,000                     | -                          |
|                                                          | PCR-all         | 36,000                                  | 1,466,292,000                     | dominated                  |
|                                                          | PCR-all-repeat  | 16,600                                  | 1,593,873,000                     | 11,000                     |
|                                                          | Self-screen     | 46,500                                  | 1,739,084,000                     | dominated                  |
|                                                          | PCR-severe-only | 55,000                                  | 1,996,374,000                     | dominated                  |
| \$51 (Base case)                                         | PCR-any-symptom | 37,600                                  | 1,421,427,000                     | -                          |
|                                                          | PCR-all         | 36,000                                  | 1,673,911,000                     | dominated                  |
|                                                          | Self-screen     | 46,500                                  | 1,753,092,000                     | dominated                  |
|                                                          | PCR-severe-only | 55,000                                  | 2,010,507,000                     | dominated                  |
|                                                          | PCR-all-repeat  | 16,600                                  | 2,532,432,000                     | 53,000                     |
| \$103                                                    | PCR-any-symptom | 37,600                                  | 1,537,754,000                     | -                          |
|                                                          | Self-screen     | 46,500                                  | 1,781,111,000                     | dominated                  |
|                                                          | PCR-severe-only | 55,000                                  | 2,038,780,000                     | dominated                  |
|                                                          | PCR-all         | 36,000                                  | 2,089,231,000                     | dominated                  |
|                                                          | PCR-all-repeat  | 16,600                                  | 4,409,916,000                     | 137,000                    |

**Supplementary Table 9.** One-way sensitivity analysis: varying the costs of PCR Test (continued)

---

Abbreviations: No. Number; PCR, Polymerase chain reaction; Re, Effective reproduction number; \$, US dollars; ICER, Incremental cost-effectiveness ratio; QALY, Quality-adjusted life-years

<sup>a</sup> Life-years lost are rounded to the nearest 100. Costs are rounded to the nearest 1,000.

<sup>b</sup> Incremental cost effectiveness ratios are calculated by dividing the difference in total life-years lost by the difference in total healthcare-related costs compared to the next most expensive strategy. Dominated strategies are either more expensive and less effective (strong dominance) or more expensive and more effective but a less efficient than a subsequent strategy (weak dominance). Strategies are listed in order of increasing cost as per cost-effectiveness analysis convention.

---

**Supplementary Table 9.** One-way sensitivity analysis: additional cost of offering a PCR test

| Added cost of offering PCR test                               | Strategy        | Total life-years lost, No. <sup>a</sup> | Healthcare costs, \$ <sup>a</sup> | ICER, \$/QALY <sup>b</sup> |
|---------------------------------------------------------------|-----------------|-----------------------------------------|-----------------------------------|----------------------------|
| <b>Slowing scenario (June 1, 2020 R<sub>e</sub> 0.9)</b>      |                 |                                         |                                   |                            |
| \$0 (Base case)                                               | PCR-any-symptom | 7,300                                   | 393,037,000                       | -                          |
|                                                               | Self-screen     | 8,200                                   | 428,461,000                       | dominated                  |
|                                                               | PCR-severe-only | 10,100                                  | 492,552,000                       | dominated                  |
|                                                               | PCR-all         | 6,700                                   | 654,741,000                       | 394,000                    |
|                                                               | PCR-all-repeat  | 5,800                                   | 2,071,400,000                     | 1,540,000                  |
| \$3                                                           | PCR-any-symptom | 7,300                                   | 393,607,000                       | -                          |
|                                                               | Self-screen     | 8,200                                   | 428,800,000                       | dominated                  |
|                                                               | PCR-severe-only | 10,100                                  | 492,890,000                       | dominated                  |
|                                                               | PCR-all         | 6,700                                   | 658,860,000                       | 399,000                    |
|                                                               | PCR-all-repeat  | 5,800                                   | 2,093,919,000                     | 1,560,000                  |
| \$7                                                           | PCR-any-symptom | 7,300                                   | 394,463,000                       | -                          |
|                                                               | Self-screen     | 8,200                                   | 429,307,000                       | dominated                  |
|                                                               | PCR-severe-only | 10,100                                  | 493,399,000                       | dominated                  |
|                                                               | PCR-all         | 6,700                                   | 665,039,000                       | 407,000                    |
|                                                               | PCR-all-repeat  | 5,800                                   | 2,127,696,000                     | 1,590,000                  |
| \$26                                                          | PCR-any-symptom | 7,300                                   | 398,743,000                       | -                          |
|                                                               | Self-screen     | 8,200                                   | 431,846,000                       | dominated                  |
|                                                               | PCR-severe-only | 10,100                                  | 495,940,000                       | dominated                  |
|                                                               | PCR-all         | 6,700                                   | 695,935,000                       | 447,000                    |
|                                                               | PCR-all-repeat  | 5,800                                   | 2,296,583,000                     | 1,740,000                  |
| <b>Intermediate scenario (June 1, 2020 R<sub>e</sub> 1.3)</b> |                 |                                         |                                   |                            |
| \$0 (Base case)                                               | PCR-any-symptom | 11,100                                  | 506,489,000                       | -                          |
|                                                               | Self-screen     | 14,100                                  | 636,392,000                       | dominated                  |
|                                                               | PCR-all         | 9,700                                   | 768,358,000                       | 181,000                    |
|                                                               | PCR-severe-only | 20,100                                  | 832,028,000                       | dominated                  |
|                                                               | PCR-all-repeat  | 6,800                                   | 2,111,387,000                     | 468,000                    |
| \$3                                                           | PCR-any-symptom | 11,100                                  | 507,160,000                       | -                          |
|                                                               | Self-screen     | 14,100                                  | 636,733,000                       | dominated                  |
|                                                               | PCR-all         | 9,700                                   | 772,598,000                       | 184,000                    |
|                                                               | PCR-severe-only | 20,100                                  | 832,373,000                       | dominated                  |
|                                                               | PCR-all-repeat  | 6,800                                   | 2,134,015,000                     | 475,000                    |

**Supplementary Table 9.** One-way sensitivity analysis: additional cost of offering a PCR test (continued)

| Added cost of offering PCR test                                           | Strategy        | Total life-years lost, No. <sup>a</sup> | Healthcare costs, \$ <sup>a</sup> | ICER, \$/QALY <sup>b</sup> |
|---------------------------------------------------------------------------|-----------------|-----------------------------------------|-----------------------------------|----------------------------|
| <b>Intermediate scenario (June 1, 2020 R<sub>e</sub> 1.3) (continued)</b> |                 |                                         |                                   |                            |
| \$7                                                                       | PCR-any-symptom | 11,100                                  | 508,167,000                       | -                          |
|                                                                           | Self-screen     | 14,100                                  | 637,245,000                       | dominated                  |
|                                                                           | PCR-all         | 9,700                                   | 778,957,000                       | 187,000                    |
|                                                                           | PCR-severe-only | 20,100                                  | 832,889,000                       | dominated                  |
|                                                                           | PCR-all-repeat  | 6,800                                   | 2,167,956,000                     | 484,000                    |
| \$26                                                                      | PCR-any-symptom | 11,100                                  | 513,198,000                       | -                          |
|                                                                           | Self-screen     | 14,100                                  | 639,804,000                       | dominated                  |
|                                                                           | PCR-all         | 9,700                                   | 810,756,000                       | 206,000                    |
|                                                                           | PCR-severe-only | 20,100                                  | 835,472,000                       | dominated                  |
|                                                                           | PCR-all-repeat  | 6,800                                   | 2,337,662,000                     | 532,000                    |
| <b>Surging scenario (June 1, 2020 R<sub>e</sub> 2.0)</b>                  |                 |                                         |                                   |                            |
| \$0 (Base case)                                                           | PCR-any-symptom | 37,600                                  | 1,421,427,000                     | -                          |
|                                                                           | PCR-all         | 36,000                                  | 1,673,911,000                     | dominated                  |
|                                                                           | Self-screen     | 46,500                                  | 1,753,092,000                     | dominated                  |
|                                                                           | PCR-severe-only | 55,000                                  | 2,010,507,000                     | dominated                  |
|                                                                           | PCR-all-repeat  | 16,600                                  | 2,532,432,000                     | 53,000                     |
| \$3                                                                       | PCR-any-symptom | 37,600                                  | 1,422,901,000                     | -                          |
|                                                                           | PCR-all         | 36,000                                  | 1,679,173,000                     | dominated                  |
|                                                                           | Self-screen     | 46,500                                  | 1,753,446,000                     | dominated                  |
|                                                                           | PCR-severe-only | 55,000                                  | 2,010,865,000                     | dominated                  |
|                                                                           | PCR-all-repeat  | 16,600                                  | 2,556,216,000                     | 54,000                     |
| \$7                                                                       | PCR-any-symptom | 37,600                                  | 1,425,111,000                     | -                          |
|                                                                           | PCR-all         | 36,000                                  | 1,687,065,000                     | dominated                  |
|                                                                           | Self-screen     | 46,500                                  | 1,753,979,000                     | dominated                  |
|                                                                           | PCR-severe-only | 55,000                                  | 2,011,403,000                     | dominated                  |
|                                                                           | PCR-all-repeat  | 16,600                                  | 2,591,893,000                     | 56,000                     |
| \$26                                                                      | PCR-any-symptom | 37,600                                  | 1,436,164,000                     | -                          |
|                                                                           | PCR-all         | 36,000                                  | 1,726,524,000                     | dominated                  |
|                                                                           | Self-screen     | 46,500                                  | 1,756,641,000                     | dominated                  |
|                                                                           | PCR-severe-only | 55,000                                  | 2,014,089,000                     | dominated                  |
|                                                                           | PCR-all-repeat  | 16,600                                  | 2,770,274,000                     | 64,000                     |

**Supplementary Table 9.** One-way sensitivity analysis: additional cost of offering a PCR test (continued)

---

Abbreviations: No., Number; PCR, Polymerase chain reaction;  $R_e$ , Effective reproduction number; \$, US dollars; ICER, Incremental cost-effectiveness ratio; QALY, Quality-adjusted life-years

<sup>a</sup> Life-years lost are rounded to the nearest 100. Costs are rounded to the nearest 1,000.

<sup>b</sup> Incremental cost effectiveness ratios are calculated by dividing the difference in total life-years lost by the difference in total healthcare-related costs compared to the next most expensive strategy. Dominated strategies are either more expensive and less effective (strong dominance) or more expensive and more effective but a less efficient than a subsequent strategy (weak dominance). Strategies are listed in order of increasing cost as per cost-effectiveness analysis convention.

---

**Supplementary Table 10.** One-way sensitivity analysis: hospital bed-day cost

| Hospital bed-day cost                                         | Strategy        | Total life-years lost, No. <sup>a</sup> | Healthcare costs, \$ <sup>a</sup> | ICER, \$/QALY <sup>b</sup> |
|---------------------------------------------------------------|-----------------|-----------------------------------------|-----------------------------------|----------------------------|
| <b>Slowing scenario (June 1, 2020 R<sub>e</sub> 0.9)</b>      |                 |                                         |                                   |                            |
| \$820                                                         | PCR-any-symptom | 7,300                                   | 306,859,000                       | -                          |
|                                                               | Self-screen     | 8,200                                   | 327,799,000                       | dominated                  |
|                                                               | PCR-severe-only | 10,100                                  | 378,417,000                       | dominated                  |
|                                                               | PCR-all         | 6,700                                   | 572,495,000                       | 400,000                    |
|                                                               | PCR-all-repeat  | 5,800                                   | 1,998,760,000                     | 1,551,000                  |
| \$1,640 (Base case)                                           | PCR-any-symptom | 7,300                                   | 393,037,000                       | -                          |
|                                                               | Self-screen     | 8,200                                   | 428,461,000                       | dominated                  |
|                                                               | PCR-severe-only | 10,100                                  | 492,552,000                       | dominated                  |
|                                                               | PCR-all         | 6,700                                   | 654,741,000                       | 394,000                    |
|                                                               | PCR-all-repeat  | 5,800                                   | 2,071,400,000                     | 1,540,000                  |
| \$3,280                                                       | PCR-any-symptom | 7,300                                   | 565,392,000                       | -                          |
|                                                               | Self-screen     | 8,200                                   | 629,785,000                       | dominated                  |
|                                                               | PCR-severe-only | 10,100                                  | 720,820,000                       | dominated                  |
|                                                               | PCR-all         | 6,700                                   | 819,231,000                       | 382,000                    |
|                                                               | PCR-all-repeat  | 5,800                                   | 2,216,680,000                     | 1,519,000                  |
| <b>Intermediate scenario (June 1, 2020 R<sub>e</sub> 1.3)</b> |                 |                                         |                                   |                            |
| \$820                                                         | PCR-any-symptom | 11,100                                  | 392,812,000                       | -                          |
|                                                               | Self-screen     | 14,100                                  | 483,859,000                       | dominated                  |
|                                                               | PCR-severe-only | 20,100                                  | 628,715,000                       | dominated                  |
|                                                               | PCR-all         | 9,700                                   | 661,333,000                       | 186,000                    |
|                                                               | PCR-all-repeat  | 6,800                                   | 2,030,467,000                     | 477,000                    |
| \$1,640 (Base case)                                           | PCR-any-symptom | 11,100                                  | 506,489,000                       | -                          |
|                                                               | Self-screen     | 14,100                                  | 636,392,000                       | dominated                  |
|                                                               | PCR-all         | 9,700                                   | 768,358,000                       | 181,000                    |
|                                                               | PCR-severe-only | 20,100                                  | 832,028,000                       | dominated                  |
|                                                               | PCR-all-repeat  | 6,800                                   | 2,111,387,000                     | 468,000                    |
| \$3,280                                                       | PCR-any-symptom | 11,100                                  | 733,845,000                       | -                          |
|                                                               | Self-screen     | 14,100                                  | 941,457,000                       | dominated                  |
|                                                               | PCR-all         | 9,700                                   | 982,408,000                       | 172,000                    |
|                                                               | PCR-severe-only | 20,100                                  | 1,238,655,000                     | dominated                  |
|                                                               | PCR-all-repeat  | 6,800                                   | 2,273,227,000                     | 450,000                    |

**Supplementary Table 10.** One-way sensitivity analysis: hospital bed-day cost (continued)

| Hospital bed-day cost                                    | Strategy        | Total life-years       |                                   |                            |
|----------------------------------------------------------|-----------------|------------------------|-----------------------------------|----------------------------|
|                                                          |                 | lost, No. <sup>a</sup> | Healthcare costs, \$ <sup>a</sup> | ICER, \$/QALY <sup>b</sup> |
| <b>Surging scenario (June 1, 2020 R<sub>e</sub> 2.0)</b> |                 |                        |                                   |                            |
| \$820                                                    | PCR-any-symptom | 37,600                 | 1,086,430,000                     | -                          |
|                                                          | Self-screen     | 46,500                 | 1,310,778,000                     | dominated                  |
|                                                          | PCR-all         | 36,000                 | 1,348,190,000                     | dominated                  |
|                                                          | PCR-severe-only | 55,000                 | 1,508,073,000                     | dominated                  |
|                                                          | PCR-all-repeat  | 16,600                 | 2,364,582,000                     | 61,000                     |
| \$1,640 (Base case)                                      | PCR-any-symptom | 37,600                 | 1,421,427,000                     | -                          |
|                                                          | PCR-all         | 36,000                 | 1,673,911,000                     | dominated                  |
|                                                          | Self-screen     | 46,500                 | 1,753,092,000                     | dominated                  |
|                                                          | PCR-severe-only | 55,000                 | 2,010,507,000                     | dominated                  |
|                                                          | PCR-all-repeat  | 16,600                 | 2,532,432,000                     | 53,000                     |
| \$3,280                                                  | PCR-any-symptom | 37,600                 | 2,091,421,000                     | -                          |
|                                                          | PCR-all         | 36,000                 | 2,325,355,000                     | dominated                  |
|                                                          | Self-screen     | 46,500                 | 2,637,719,000                     | dominated                  |
|                                                          | PCR-all-repeat  | 16,600                 | 2,868,132,000                     | dominated                  |
|                                                          | PCR-severe-only | 55,000                 | 3,015,376,000                     | 37,000                     |

Abbreviations: No., Number; PCR, Polymerase chain reaction; R<sub>e</sub>, Effective reproduction number; \$, US dollars; ICER, Incremental cost-effectiveness ratio; QALY, Quality-adjusted life-years

<sup>a</sup> Life-years lost are rounded to the nearest 100. Costs are rounded to the nearest 1,000.

<sup>b</sup> Incremental cost effectiveness ratios are calculated by dividing the difference in total life-years lost by the difference in total healthcare-related costs compared to the next most expensive strategy. Dominated strategies are either more expensive and less effective (strong dominance) or more expensive and more effective but a less efficient than a subsequent strategy (weak dominance). Strategies are listed in order of increasing cost as per cost-effectiveness analysis convention.



**Supplementary Table 11.** One-way sensitivity analysis: intensive care unit bed-day cost

| ICU bed-day cost                                              | Strategy        | Total life-years lost, No. <sup>a</sup> | Healthcare costs, \$ <sup>a</sup> | ICER, \$/QALY <sup>b</sup> |
|---------------------------------------------------------------|-----------------|-----------------------------------------|-----------------------------------|----------------------------|
| <b>Slowing scenario (June 1, 2020 R<sub>e</sub> 0.9)</b>      |                 |                                         |                                   |                            |
| \$1,340                                                       | PCR-any-symptom | 7,300                                   | 305,251,000                       | -                          |
|                                                               | Self-screen     | 8,200                                   | 328,292,000                       | dominated                  |
|                                                               | PCR-severe-only | 10,100                                  | 373,828,000                       | dominated                  |
|                                                               | PCR-all         | 6,700                                   | 572,236,000                       | 402,000                    |
|                                                               | PCR-all-repeat  | 5,800                                   | 1,997,144,000                     | 1,549,000                  |
| \$2,680 (Base case)                                           | PCR-any-symptom | 7,300                                   | 393,037,000                       | -                          |
|                                                               | Self-screen     | 8,200                                   | 428,461,000                       | dominated                  |
|                                                               | PCR-severe-only | 10,100                                  | 492,552,000                       | dominated                  |
|                                                               | PCR-all         | 6,700                                   | 654,741,000                       | 394,000                    |
|                                                               | PCR-all-repeat  | 5,800                                   | 2,071,400,000                     | 1,540,000                  |
| \$5,370                                                       | PCR-any-symptom | 7,300                                   | 568,673,000                       | -                          |
|                                                               | Self-screen     | 8,200                                   | 628,873,000                       | dominated                  |
|                                                               | PCR-severe-only | 10,100                                  | 730,087,000                       | dominated                  |
|                                                               | PCR-all         | 6,700                                   | 819,811,000                       | 378,000                    |
|                                                               | PCR-all-repeat  | 5,800                                   | 2,219,968,000                     | 1,522,000                  |
| <b>Intermediate scenario (June 1, 2020 R<sub>e</sub> 1.3)</b> |                 |                                         |                                   |                            |
| \$1,340                                                       | PCR-any-symptom | 11,100                                  | 393,444,000                       | -                          |
|                                                               | Self-screen     | 14,100                                  | 484,253,000                       | dominated                  |
|                                                               | PCR-severe-only | 20,100                                  | 632,994,000                       | dominated                  |
|                                                               | PCR-all         | 9,700                                   | 658,585,000                       | 183,000                    |
|                                                               | PCR-all-repeat  | 6,800                                   | 2,029,736,000                     | 478,000                    |
| \$2,680 (Base case)                                           | PCR-any-symptom | 11,100                                  | 506,489,000                       | -                          |
|                                                               | Self-screen     | 14,100                                  | 636,392,000                       | dominated                  |
|                                                               | PCR-all         | 9,700                                   | 768,358,000                       | 181,000                    |
|                                                               | PCR-severe-only | 20,100                                  | 832,028,000                       | dominated                  |
|                                                               | PCR-all-repeat  | 6,800                                   | 2,111,387,000                     | 468,000                    |
| \$5,370                                                       | PCR-any-symptom | 11,100                                  | 732,664,000                       | -                          |
|                                                               | Self-screen     | 14,100                                  | 940,783,000                       | dominated                  |
|                                                               | PCR-all         | 9,700                                   | 987,985,000                       | 177,000                    |
|                                                               | PCR-severe-only | 20,100                                  | 1,230,246,000                     | dominated                  |
|                                                               | PCR-all-repeat  | 6,800                                   | 2,274,750,000                     | 449,000                    |

**Supplementary Table 11.** One-way sensitivity analysis: intensive care unit bed-day cost (continued)

| ICU bed-day cost                                         | Strategy        | Total life-years lost, No. <sup>a</sup> | Healthcare costs, \$ <sup>a</sup> | ICER, \$/QALY <sup>b</sup> |
|----------------------------------------------------------|-----------------|-----------------------------------------|-----------------------------------|----------------------------|
| <b>Surging scenario (June 1, 2020 R<sub>e</sub> 2.0)</b> |                 |                                         |                                   |                            |
| \$1,340                                                  | PCR-any-symptom | 37,600                                  | 1,103,992,000                     | -                          |
|                                                          | Self-screen     | 46,500                                  | 1,333,026,000                     | dominated                  |
|                                                          | PCR-all         | 36,000                                  | 1,370,450,000                     | dominated                  |
|                                                          | PCR-severe-only | 55,000                                  | 1,522,006,000                     | dominated                  |
|                                                          | PCR-all-repeat  | 16,600                                  | 2,372,868,000                     | 61,000                     |
| \$2,680 (Base case)                                      | PCR-any-symptom | 37,600                                  | 1,421,427,000                     | -                          |
|                                                          | PCR-all         | 36,000                                  | 1,673,911,000                     | dominated                  |
|                                                          | Self-screen     | 46,500                                  | 1,753,092,000                     | dominated                  |
|                                                          | PCR-severe-only | 55,000                                  | 2,010,507,000                     | dominated                  |
|                                                          | PCR-all-repeat  | 16,600                                  | 2,532,432,000                     | 53,000                     |
| \$5,370                                                  | PCR-any-symptom | 37,600                                  | 2,056,533,000                     | -                          |
|                                                          | PCR-all         | 36,000                                  | 2,281,061,000                     | dominated                  |
|                                                          | Self-screen     | 46,500                                  | 2,593,535,000                     | dominated                  |
|                                                          | PCR-all-repeat  | 16,600                                  | 2,851,680,000                     | 38,000                     |
|                                                          | PCR-severe-only | 55,000                                  | 2,987,874,000                     | dominated                  |

Abbreviations: No., Number; ICU, Intensive care unit; PCR, Polymerase chain reaction; R<sub>e</sub>, Effective reproduction number; \$, US dollars; ICER, Incremental cost-effectiveness ratio; QALY, Quality-adjusted life-years

<sup>a</sup> Life-years lost are rounded to the nearest 100. Costs are rounded to the nearest 1,000.

<sup>b</sup> Incremental cost effectiveness ratios are calculated by dividing the difference in total life-years lost by the difference in total healthcare-related costs compared to the next most expensive strategy. Dominated strategies are either more expensive and less effective (strong dominance) or more expensive and more effective but a less efficient than a subsequent strategy (weak dominance). Strategies are listed in order of increasing cost as per cost-effectiveness analysis convention.

**Supplementary Table 12.** Scenario analysis:  $R_e$  threshold for cost-effectiveness of PCR-all-repeat testing strategy

| $R_e$ | Strategy        | Total quality-adjusted life-years lost <sup>a</sup> | Healthcare cost, \$ <sup>a</sup> | ICER, \$/QALY <sup>b</sup> |
|-------|-----------------|-----------------------------------------------------|----------------------------------|----------------------------|
| 1.3   | PCR-any-symptom | 11,100                                              | 506,489,000                      | -                          |
|       | Self-screen     | 14,100                                              | 636,392,000                      | dominated                  |
|       | PCR-all         | 9,700                                               | 768,358,000                      | 181,000                    |
|       | PCR-severe-only | 20,100                                              | 832,028,000                      | dominated                  |
|       | PCR-all-repeat  | 6,800                                               | 2,111,387,000                    | 468,000                    |
| 1.4   | PCR-any-symptom | 12,900                                              | 563,940,000                      | -                          |
|       | Self-screen     | 17,600                                              | 751,489,000                      | dominated                  |
|       | PCR-all         | 11,500                                              | 822,263,000                      | 186,000                    |
|       | PCR-severe-only | 24,700                                              | 997,869,000                      | dominated                  |
|       | PCR-all-repeat  | 7,500                                               | 2,135,526,000                    | 327,000                    |
| 1.5   | PCR-any-symptom | 14,800                                              | 641,247,000                      | -                          |
|       | Self-screen     | 20,800                                              | 864,182,000                      | dominated                  |
|       | PCR-all         | 13,300                                              | 885,507,000                      | 163,000                    |
|       | PCR-severe-only | 29,100                                              | 1,150,596,000                    | dominated                  |
|       | PCR-all-repeat  | 7,900                                               | 2,164,444,000                    | 238,000                    |
| 1.6   | PCR-any-symptom | 17,900                                              | 776,738,000                      | -                          |
|       | PCR-all         | 16,300                                              | 992,658,000                      | 136,000                    |
|       | Self-screen     | 27,100                                              | 1,054,899,000                    | dominated                  |
|       | PCR-severe-only | 35,300                                              | 1,359,162,000                    | dominated                  |
|       | PCR-all-repeat  | 8,800                                               | 2,187,983,000                    | 159,000                    |
| 1.7   | PCR-any-symptom | 21,400                                              | 867,633,000                      | -                          |
|       | PCR-all         | 19,800                                              | 1,094,131,000                    | dominated                  |
|       | Self-screen     | 30,100                                              | 1,162,715,000                    | dominated                  |
|       | PCR-severe-only | 39,700                                              | 1,507,097,000                    | dominated                  |
|       | PCR-all-repeat  | 9,700                                               | 2,237,080,000                    | 117,000                    |
| 1.8   | PCR-any-symptom | 26,900                                              | 1,037,823,000                    | -                          |
|       | PCR-all         | 24,200                                              | 1,261,625,000                    | 83,000                     |
|       | Self-screen     | 36,700                                              | 1,382,196,000                    | dominated                  |
|       | PCR-severe-only | 45,500                                              | 1,690,743,000                    | dominated                  |
|       | PCR-all-repeat  | 12,100                                              | 2,327,317,000                    | 88,000                     |

**Supplementary Table 12.** Scenario analysis:  $R_e$  threshold for cost-effectiveness of PCR-all-repeat testing strategy (continued)

| $R_e$ | Strategy        | Total quality-adjusted life-years lost <sup>a</sup> | Healthcare costs, \$ <sup>a</sup> | ICER, \$/QALY <sup>b</sup> |
|-------|-----------------|-----------------------------------------------------|-----------------------------------|----------------------------|
| 1.9   | PCR-any-symptom | 31,000                                              | 1,210,192,000                     | -                          |
|       | PCR-all         | 29,200                                              | 1,430,673,000                     | dominated                  |
|       | Self-screen     | 41,600                                              | 1,578,223,000                     | dominated                  |
|       | PCR-severe-only | 50,400                                              | 1,864,492,000                     | dominated                  |
|       | PCR-all-repeat  | 13,200                                              | 2,398,244,000                     | 67,000                     |
| 2.0   | PCR-any-symptom | 37,600                                              | 1,421,427,000                     | -                          |
|       | PCR-all         | 36,000                                              | 1,673,911,000                     | dominated                  |
|       | Self-screen     | 46,500                                              | 1,753,092,000                     | dominated                  |
|       | PCR-severe-only | 55,000                                              | 2,010,507,000                     | dominated                  |
|       | PCR-all-repeat  | 16,600                                              | 2,532,432,000                     | 53,000                     |

Abbreviations: PCR, Polymerase chain reaction;  $R_e$ , Effective reproduction number; \$, US dollars; ICER, Incremental cost-effectiveness ratio; QALY, Quality-adjusted life-years

<sup>a</sup> Quality-adjusted life-years lost are rounded to the nearest 100. Costs are rounded to the nearest 1,000.

<sup>b</sup> Incremental cost effectiveness ratios are calculated by dividing the difference in total life-years lost by the difference in total healthcare-related costs compared to the next most expensive strategy. Dominated strategies are either more expensive and less effective (strong dominance) or more expensive and more effective but a less efficient than a subsequent strategy (weak dominance). Strategies are listed in order of increasing cost as per cost-effectiveness analysis convention.

**Supplementary Table 13.** Sensitivity analysis for PCR-all-repeat testing: Frequency of retesting those with no observed symptoms (surging scenario:  $R_e$  2.0)

| Frequency                                                   | Total life-years lost, No. <sup>a</sup> | Healthcare costs, \$ <sup>a</sup> | ICER, \$/QALY <sup>b</sup> |
|-------------------------------------------------------------|-----------------------------------------|-----------------------------------|----------------------------|
| <b>Surging scenario (June 1, 2020 <math>R_e</math> 2.0)</b> |                                         |                                   |                            |
| PCR-any-symptom                                             | 37,600                                  | 1,421,427,000                     | -                          |
| 30 Days (Base case) PCR-all-repeat                          | 16,600                                  | 2,532,432,000                     | 53,000                     |
| 14 days PCR-all-repeat                                      | 15,600                                  | 4,406,890,000                     | 1,783,000                  |
| 7 days PCR-all-repeat                                       | 13,500                                  | 7,922,086,000                     | 1,702,000                  |

Abbreviations: No., Number; PCR, Polymerase chain reaction;  $R_e$ , Effective reproduction number; \$, US dollars; ICER, Incremental cost-effectiveness ratio; QALY, Quality-adjusted life-years

<sup>a</sup> Life-years lost are rounded to the nearest 100. Costs are rounded to the nearest 1,000.

<sup>b</sup> Incremental cost effectiveness ratios are calculated by dividing the difference in total life-years lost by the difference in total healthcare-related costs compared to the next most expensive strategy. Dominated strategies are either more expensive and less effective (strong dominance) or more expensive and more effective but a less efficient than a subsequent strategy (weak dominance). Strategies are listed in order of increasing cost as per cost-effectiveness analysis convention.

**Supplementary Table 14.** Scenario analysis: varying COVID-19-like illness probability

| COVID-19-like illness rate                                    | Strategy        | PCR tests/simulation day, mean <sup>a</sup> | PCR tests, total <sup>a,b</sup> | Cumulative duration of self-isolation days | Total life-years lost, n <sup>a,b,c</sup> | Healthcare costs, \$ <sup>a</sup> | ICER, \$/QALY <sup>d</sup> |
|---------------------------------------------------------------|-----------------|---------------------------------------------|---------------------------------|--------------------------------------------|-------------------------------------------|-----------------------------------|----------------------------|
| <b>Slowing scenario (June 1, 2020 R<sub>e</sub> 0.9)</b>      |                 |                                             |                                 |                                            |                                           |                                   |                            |
| Summer COVID-19-like illness probability                      | PCR-any-symptom | 2,400                                       | 440,800                         | 0.3                                        | 7,400                                     | 360,717,000                       | -                          |
|                                                               | Self-screen     | 100                                         | 18,800                          | 0.6                                        | 8,100                                     | 396,450,000                       | dominated                  |
|                                                               | PCR-severe-only | 100                                         | 21,000                          | -                                          | 10,400                                    | 454,504,000                       | dominated                  |
|                                                               | PCR-all         | 32,800                                      | 5,905,900                       | 0.3                                        | 6,600                                     | 626,561,000                       | 347,000                    |
|                                                               | PCR-all-repeat  | 188,400                                     | 33,919,800                      | 0.3                                        | 6,100                                     | 2,045,806,000                     | 2,946,000                  |
| 0.5x                                                          | PCR-any-symptom | 3,300                                       | 599,300                         | 0.3                                        | 7,400                                     | 362,303,000                       | -                          |
|                                                               | Self-screen     | 1,500                                       | 267,100                         | 0.5                                        | 8,500                                     | 407,442,000                       | dominated                  |
|                                                               | PCR-severe-only | 1,500                                       | 270,000                         | -                                          | 10,000                                    | 461,160,000                       | dominated                  |
|                                                               | PCR-all         | 33,700                                      | 6,057,600                       | 0.3                                        | 7,100                                     | 628,832,000                       | 830,000                    |
|                                                               | PCR-all-repeat  | 189,900                                     | 34,176,400                      | 0.3                                        | 5,900                                     | 2,048,797,000                     | 1,255,000                  |
| 1x (Base case)                                                | PCR-any-symptom | 4,900                                       | 877,900                         | 0.3                                        | 7,300                                     | 393,037,000                       | -                          |
|                                                               | Self-screen     | 2,900                                       | 520,800                         | 0.5                                        | 8,200                                     | 428,461,000                       | dominated                  |
|                                                               | PCR-severe-only | 2,900                                       | 521,300                         | -                                          | 10,100                                    | 492,552,000                       | dominated                  |
|                                                               | PCR-all         | 35,200                                      | 6,337,500                       | 0.3                                        | 6,700                                     | 654,741,000                       | 394,000                    |
|                                                               | PCR-all-repeat  | 192,500                                     | 34,643,400                      | 0.3                                        | 5,800                                     | 2,071,400,000                     | 1,540,000                  |
| 2x                                                            | PCR-any-symptom | 8,000                                       | 1,435,300                       | 0.3                                        | 7,300                                     | 411,805,000                       | -                          |
|                                                               | Self-screen     | 5,700                                       | 1,028,000                       | 0.6                                        | 8,700                                     | 443,900,000                       | dominated                  |
|                                                               | PCR-severe-only | 5,700                                       | 1,027,200                       | -                                          | 10,400                                    | 495,648,000                       | dominated                  |
|                                                               | PCR-all         | 38,300                                      | 6,890,400                       | 0.3                                        | 6,600                                     | 673,087,000                       | 407,000                    |
|                                                               | PCR-all-repeat  | 197,400                                     | 35,525,200                      | 0.3                                        | 5,900                                     | 2,120,089,000                     | 1,963,000                  |
| <b>Intermediate scenario (June 1, 2020 R<sub>e</sub> 1.3)</b> |                 |                                             |                                 |                                            |                                           |                                   |                            |
| Summer COVID-19-like illness probability                      | PCR-any-symptom | 3,300                                       | 589,500                         | 0.4                                        | 11,000                                    | 463,649,000                       | -                          |
|                                                               | Self-screen     | 100                                         | 25,900                          | 0.9                                        | 14,100                                    | 596,568,000                       | dominated                  |
|                                                               | PCR-all         | 33,800                                      | 6,080,200                       | 0.4                                        | 9,700                                     | 733,170,000                       | 204,000                    |
|                                                               | PCR-severe-only | 200                                         | 32,800                          | -                                          | 20,400                                    | 797,849,000                       | dominated                  |
|                                                               | PCR-all-repeat  | 189,400                                     | 34,091,400                      | 0.4                                        | 6,900                                     | 2,088,947,000                     | 490,000                    |
| 0.5x                                                          | PCR-any-symptom | 4,200                                       | 751,600                         | 0.4                                        | 11,000                                    | 482,510,000                       | -                          |
|                                                               | Self-screen     | 1,500                                       | 273,000                         | 0.9                                        | 15,200                                    | 633,509,000                       | dominated                  |
|                                                               | PCR-all         | 34,600                                      | 6,235,400                       | 0.4                                        | 10,100                                    | 737,667,000                       | 269,000                    |
|                                                               | PCR-severe-only | 1,500                                       | 278,200                         | -                                          | 19,800                                    | 808,458,000                       | dominated                  |
|                                                               | PCR-all-repeat  | 190,800                                     | 34,346,800                      | 0.4                                        | 7,000                                     | 2,092,276,000                     | 443,000                    |

**Supplementary Table 14.** Scenario analysis: varying COVID-19-like illness rates (continued)

| COVID-19-like illness rate                                                | Strategy        | PCR tests/simulation day, mean <sup>a</sup> | PCR tests, total <sup>a,b</sup> | Cumulative duration of self-isolation days | Total life-years lost, n <sup>a,b,c</sup> | Healthcare costs, \$ <sup>a,b</sup> | ICER, \$/QALY <sup>d</sup> |
|---------------------------------------------------------------------------|-----------------|---------------------------------------------|---------------------------------|--------------------------------------------|-------------------------------------------|-------------------------------------|----------------------------|
| <b>Intermediate scenario (June 1, 2020 R<sub>e</sub> 1.3) (continued)</b> |                 |                                             |                                 |                                            |                                           |                                     |                            |
| 1x<br>(Base case)                                                         | PCR-any-symptom | 5,700                                       | 1,032,100                       | 0.4                                        | 11,100                                    | 506,489,000                         | -                          |
|                                                                           | Self-screen     | 2,900                                       | 524,900                         | 0.9                                        | 14,100                                    | 636,392,000                         | dominated                  |
|                                                                           | PCR-all         | 36,200                                      | 6,522,700                       | 0.4                                        | 9,700                                     | 768,358,000                         | 181,000                    |
|                                                                           | PCR-severe-only | 2,900                                       | 529,800                         | -                                          | 20,100                                    | 832,028,000                         | dominated                  |
|                                                                           | PCR-all-repeat  | 193,400                                     | 34,811,600                      | 0.4                                        | 6,800                                     | 2,111,387,000                       | 468,000                    |
| 2x                                                                        | PCR-any-symptom | 8,800                                       | 1,588,700                       | 0.4                                        | 10,900                                    | 531,735,000                         | -                          |
|                                                                           | Self-screen     | 5,700                                       | 1,028,200                       | 1                                          | 14,800                                    | 658,703,000                         | dominated                  |
|                                                                           | PCR-all         | 39,200                                      | 7,059,800                       | 0.4                                        | 9,900                                     | 779,216,000                         | 259,000                    |
|                                                                           | PCR-severe-only | 5,700                                       | 1,026,700                       | -                                          | 20,000                                    | 841,120,000                         | dominated                  |
|                                                                           | PCR-all-repeat  | 198,200                                     | 35,684,600                      | 0.4                                        | 6,900                                     | 2,155,479,000                       | 461,000                    |
| <b>Surging scenario (June 1, 2020 R<sub>e</sub> 2.0)</b>                  |                 |                                             |                                 |                                            |                                           |                                     |                            |
| Summer<br>COVID-19-like<br>illness rate                                   | PCR-any-symptom | 10,200                                      | 1,828,900                       | 1.4                                        | 37,600                                    | 1,386,897,000                       | -                          |
|                                                                           | PCR-all         | 42,700                                      | 7,680,500                       | 1.4                                        | 35,300                                    | 1,631,017,000                       | dominated                  |
|                                                                           | Self-screen     | 300                                         | 62,800                          | 2.9                                        | 45,900                                    | 1,716,795,000                       | dominated                  |
|                                                                           | PCR-severe-only | 400                                         | 71,100                          | -                                          | 56,000                                    | 1,994,972,000                       | dominated                  |
|                                                                           | PCR-all-repeat  | 198,900                                     | 35,796,200                      | 1.1                                        | 16,300                                    | 2,475,968,000                       | 51,000                     |
| 0.5x                                                                      | PCR-any-symptom | 11,000                                      | 1,983,700                       | 1.4                                        | 38,200                                    | 1,384,809,000                       | -                          |
|                                                                           | PCR-all         | 43,400                                      | 7,810,500                       | 1.4                                        | 35,000                                    | 1,609,425,000                       | dominated                  |
|                                                                           | Self-screen     | 1,700                                       | 301,200                         | 2.8                                        | 47,200                                    | 1,712,068,000                       | dominated                  |
|                                                                           | PCR-severe-only | 1,700                                       | 309,400                         | -                                          | 55,300                                    | 1,992,291,000                       | dominated                  |
|                                                                           | PCR-all-repeat  | 200,500                                     | 36,091,500                      | 1.1                                        | 16,500                                    | 2,488,751,000                       | 51,000                     |
| 1x<br>Base case                                                           | PCR-any-symptom | 12,600                                      | 2,267,100                       | 1.4                                        | 37,600                                    | 1,421,427,000                       | -                          |
|                                                                           | PCR-all         | 45,000                                      | 8,094,300                       | 1.4                                        | 36,000                                    | 1,673,911,000                       | dominated                  |
|                                                                           | Self-screen     | 3,000                                       | 546,100                         | 2.8                                        | 46,500                                    | 1,753,092,000                       | dominated                  |
|                                                                           | PCR-severe-only | 3,100                                       | 551,000                         | -                                          | 55,000                                    | 2,010,507,000                       | dominated                  |
|                                                                           | PCR-all-repeat  | 203,300                                     | 36,591,000                      | 1.1                                        | 16,600                                    | 2,532,432,000                       | 53,000                     |

**Supplementary Table 14.** Scenario analysis: varying COVID-19-like illness rates (continued)

| COVID-19-like illness rate                                           | Strategy        | PCR tests/simulation day, mean <sup>a</sup> | PCR tests, total <sup>a,b</sup> | Cumulative duration of self-isolation days | Total life-years lost, n <sup>a,b,c</sup> | Healthcare costs, \$ <sup>a,b</sup> | ICER, \$/QALY <sup>d</sup> |
|----------------------------------------------------------------------|-----------------|---------------------------------------------|---------------------------------|--------------------------------------------|-------------------------------------------|-------------------------------------|----------------------------|
| <b>Surging scenario (June 1, 2020 R<sub>e</sub> 2.0) (continued)</b> |                 |                                             |                                 |                                            |                                           |                                     |                            |
| 2x                                                                   | PCR-any-symptom | 15,600                                      | 2,804,700                       | 1.4                                        | 37,900                                    | 1,444,124,000                       | -                          |
|                                                                      | PCR-all         | 47,800                                      | 8,597,500                       | 1.4                                        | 34,600                                    | 1,653,707,000                       | dominated                  |
|                                                                      | Self-screen     | 5,700                                       | 1,030,900                       | 2.9                                        | 46,900                                    | 1,757,094,000                       | dominated                  |
|                                                                      | PCR-severe-only | 5,700                                       | 1,031,100                       | -                                          | 55,100                                    | 2,021,166,000                       | dominated                  |
|                                                                      | PCR-all-repeat  | 207,400                                     | 37,337,300                      | 1.1                                        | 15,500                                    | 2,561,095,000                       | 50,000                     |

Abbreviations: PCR, Polymerase chain reaction; \$, US Dollar; ICER, Incremental cost-effectiveness ratio; QALY, Quality-adjusted life-year; R<sub>e</sub>, Effective reproduction number

<sup>a</sup> Tests, deaths, and life-years lost are rounded to the nearest 100. Costs are rounded to the nearest 1,000.

<sup>b</sup> Includes six-month time horizon between simulated days May 1, 2020 and November 1, 2020.

<sup>c</sup> Changes in COVID-19 -like illness do not vary with mortality; small variations may be seen in individual model runs.

<sup>d</sup> Incremental cost effectiveness ratios are calculated by dividing the difference in total life-years lost by the difference in total healthcare-related costs compared to the next most expensive strategy. Dominated strategies are either more expensive and less effective (strong dominance) or more expensive and more effective but a less efficient than a subsequent strategy (weak dominance). Strategies are listed in order of increasing cost as per cost-effectiveness analysis convention.



**Supplementary Table 15.** Scenario analysis: estimates of life-years lost per death due to COVID-19

| Quality-adjusted life-years lost per death                    | Strategy        | Incident infections, No. <sup>a</sup> | Deaths, No. <sup>a</sup> | Total life-years lost, No. <sup>a</sup> | Healthcare costs, \$ <sup>a</sup> | ICER, \$/QALY <sup>b</sup> |
|---------------------------------------------------------------|-----------------|---------------------------------------|--------------------------|-----------------------------------------|-----------------------------------|----------------------------|
| <b>Slowing scenario (June 1, 2020 R<sub>e</sub> 0.9)</b>      |                 |                                       |                          |                                         |                                   |                            |
| 3.18<br>(Base case)                                           | PCR-any-symptom | 316,300                               | 2,300                    | 7,300                                   | 393,037,000                       | -                          |
|                                                               | Self-screen     | 422,200                               | 2,600                    | 8,200                                   | 428,461,000                       | dominated                  |
|                                                               | PCR-severe-only | 565,300                               | 3,200                    | 10,100                                  | 492,552,000                       | dominated                  |
|                                                               | PCR-all         | 281,000                               | 2,100                    | 6,700                                   | 654,741,000                       | 394,000                    |
|                                                               | PCR-all-repeat  | 210,200                               | 1,800                    | 5,800                                   | 2,071,400,000                     | 1,540,000                  |
| 5.61                                                          | PCR-any-symptom | 316,300                               | 2,300                    | 13,000                                  | 393,037,000                       | -                          |
|                                                               | Self-screen     | 422,200                               | 2,600                    | 14,400                                  | 428,461,000                       | dominated                  |
|                                                               | PCR-severe-only | 565,300                               | 3,200                    | 17,800                                  | 492,552,000                       | dominated                  |
|                                                               | PCR-all         | 281,000                               | 2,100                    | 11,800                                  | 654,741,000                       | 223,000                    |
|                                                               | PCR-all-repeat  | 210,200                               | 1,800                    | 10,200                                  | 2,071,400,000                     | 872,000                    |
| <b>Intermediate scenario (June 1, 2020 R<sub>e</sub> 1.3)</b> |                 |                                       |                          |                                         |                                   |                            |
| 3.18<br>(Base case)                                           | PCR-any-symptom | 604,600                               | 3,500                    | 11,100                                  | 506,489,000                       | -                          |
|                                                               | Self-screen     | 975,200                               | 4,400                    | 14,100                                  | 636,392,000                       | dominated                  |
|                                                               | PCR-all         | 543,900                               | 3,000                    | 9,700                                   | 768,358,000                       | 181,000                    |
|                                                               | PCR-severe-only | 1,471,100                             | 6,300                    | 20,100                                  | 832,028,000                       | dominated                  |
|                                                               | PCR-all-repeat  | 298,300                               | 2,100                    | 6,800                                   | 2,111,387,000                     | 468,000                    |
| 5.61                                                          | PCR-any-symptom | 604,600                               | 3,500                    | 19,600                                  | 506,489,000                       | -                          |
|                                                               | Self-screen     | 975,200                               | 4,400                    | 24,900                                  | 636,392,000                       | dominated                  |
|                                                               | PCR-all         | 543,900                               | 3,000                    | 17,000                                  | 768,358,000                       | 103,000                    |
|                                                               | PCR-severe-only | 1,471,100                             | 6,300                    | 35,600                                  | 832,028,000                       | dominated                  |
|                                                               | PCR-all-repeat  | 298,300                               | 2,100                    | 12,000                                  | 2,111,387,000                     | 265,000                    |
| <b>Surging scenario (June 1, 2020 R<sub>e</sub> 2.0)</b>      |                 |                                       |                          |                                         |                                   |                            |
| 3.18<br>(Base case)                                           | PCR-any-symptom | 2,924,200                             | 11,800                   | 37,600                                  | 1,421,427,000                     | -                          |
|                                                               | PCR-all         | 2,799,400                             | 11,300                   | 36,000                                  | 1,673,911,000                     | dominated                  |
|                                                               | Self-screen     | 3,666,900                             | 14,700                   | 46,500                                  | 1,753,092,000                     | dominated                  |
|                                                               | PCR-severe-only | 4,193,800                             | 17,300                   | 55,000                                  | 2,010,507,000                     | dominated                  |
|                                                               | PCR-all-repeat  | 1,232,500                             | 5,200                    | 16,600                                  | 2,532,432,000                     | 53,000                     |
| 5.61                                                          | PCR-any-symptom | 2,924,200                             | 11,800                   | 66,400                                  | 1,421,427,000                     | -                          |
|                                                               | PCR-all         | 2,799,400                             | 11,300                   | 63,600                                  | 1,673,911,000                     | dominated                  |
|                                                               | Self-screen     | 3,666,900                             | 14,700                   | 82,200                                  | 1,753,092,000                     | dominated                  |
|                                                               | PCR-severe-only | 4,193,800                             | 17,300                   | 97,100                                  | 2,010,507,000                     | dominated                  |
|                                                               | PCR-all-repeat  | 1,232,500                             | 5,200                    | 29,400                                  | 2,532,432,000                     | 30,000                     |

**Supplementary Table 15.** Scenario analysis: estimates of life-years lost per death due to COVID-19 (continued)

---

Abbreviations: No., Number; PCR, Polymerase chain reaction; Re, Effective reproduction number; \$, US dollars; ICER, Incremental cost-effectiveness ratio; QALY, Quality-adjusted life-years

<sup>a</sup> Incident infection, deaths, and life-years lost are rounded to the nearest 100. Costs are rounded to the nearest 1,000.

<sup>b</sup> Incremental cost effectiveness ratios are calculated by dividing the difference in total life-years lost by the difference in total healthcare-related costs compared to the next most expensive strategy. Dominated strategies are either more expensive and less effective (strong dominance) or more expensive and more effective but a less efficient than a subsequent strategy (weak dominance). Strategies are listed in order of increasing cost as per cost-effectiveness analysis convention.

---

**Supplementary Table 16.** Scenario analysis: incremental cost-effectiveness ratios incorporating costs related to productivity losses and averted COVID-19-related mortality

| Strategy                                                               | Deaths, No. <sup>a</sup> | Total life-years lost, No. <sup>a</sup> | Total costs, \$ <sup>a</sup> | ICER, \$/QALY <sup>b</sup> |
|------------------------------------------------------------------------|--------------------------|-----------------------------------------|------------------------------|----------------------------|
| <b>Slowing scenario (June 1, 2020 R<sub>e</sub> 0.9)</b>               |                          |                                         |                              |                            |
| <b>Healthcare sector costs (Base case)</b>                             |                          |                                         |                              |                            |
| PCR-any-symptom                                                        | 2,300                    | 7,300                                   | 393,037,000                  | -                          |
| Self-screen                                                            | 2,600                    | 8,200                                   | 428,461,000                  | dominated                  |
| PCR-severe-only                                                        | 3,200                    | 10,100                                  | 492,552,000                  | dominated                  |
| PCR-all                                                                | 2,100                    | 6,700                                   | 654,741,000                  | 394,000                    |
| PCR-all-repeat                                                         | 1,800                    | 5,800                                   | 2,071,400,000                | 1,540,000                  |
| <b>Healthcare sector + lost productivity costs</b>                     |                          |                                         |                              |                            |
| PCR-severe-only                                                        | 3,200                    | 10,100                                  | 508,086,000                  | -                          |
| PCR-any-symptom                                                        | 2,300                    | 7,300                                   | 616,454,000                  | 40,000                     |
| Self-screen                                                            | 2,600                    | 8,200                                   | 867,490,000                  | dominated                  |
| PCR-all                                                                | 2,100                    | 6,700                                   | 897,965,000                  | 424,000                    |
| PCR-all-repeat                                                         | 1,800                    | 5,800                                   | 2,355,467,000                | 1,585,000                  |
| <b>Healthcare sector + lost productivity + averted mortality costs</b> |                          |                                         |                              |                            |
| PCR-severe-only                                                        | 3,200                    | 10,100                                  | 508,086,000                  | -                          |
| PCR-any-symptom                                                        | 2,300                    | 7,300                                   | 651,956,000                  | 53,000                     |
| Self-screen                                                            | 2,600                    | 8,200                                   | 856,868,000                  | dominated                  |
| PCR-all                                                                | 2,100                    | 6,700                                   | 917,295,000                  | 399,000                    |
| PCR-all-repeat                                                         | 1,800                    | 5,800                                   | 2,367,524,000                | 1,577,000                  |
| <b>Intermediate scenario (June 1, 2020 R<sub>e</sub> 1.3)</b>          |                          |                                         |                              |                            |
| <b>Healthcare sector costs (Base case)</b>                             |                          |                                         |                              |                            |
| PCR-any-symptom                                                        | 3,500                    | 11,100                                  | 506,489,000                  | -                          |
| Self-screen                                                            | 4,400                    | 14,100                                  | 636,392,000                  | dominated                  |
| PCR-all                                                                | 3,000                    | 9,700                                   | 768,358,000                  | 181,000                    |
| PCR-severe-only                                                        | 6,300                    | 20,100                                  | 832,028,000                  | dominated                  |
| PCR-all-repeat                                                         | 2,100                    | 6,800                                   | 2,111,387,000                | 468,000                    |
| <b>Healthcare sector + lost productivity costs</b>                     |                          |                                         |                              |                            |
| PCR-any-symptom                                                        | 3,500                    | 11,100                                  | 835,157,000                  | -                          |
| PCR-severe-only                                                        | 6,300                    | 20,100                                  | 859,701,000                  | dominated                  |
| PCR-all                                                                | 3,000                    | 9,700                                   | 1,110,737,000                | 191,000                    |
| Self-screen                                                            | 4,400                    | 14,100                                  | 1,381,688,000                | dominated                  |
| PCR-all-repeat                                                         | 2,100                    | 6,800                                   | 2,456,131,000                | 469,000                    |

**Supplementary Table 16.** Scenario analysis: incremental cost-effectiveness ratios incorporating costs related to lost productivity and averted COVID-19-related mortality (continued)

| Strategy                                                               | Deaths, No. <sup>a</sup> | Total life-years lost, No. <sup>a</sup> | Total costs, \$ <sup>a</sup> | ICER, \$/QALY <sup>b</sup> |
|------------------------------------------------------------------------|--------------------------|-----------------------------------------|------------------------------|----------------------------|
| <b>Intermediate scenario (June 1, 2020 Re 1.3) (continued)</b>         |                          |                                         |                              |                            |
| <b>Healthcare sector + lost productivity + averted mortality costs</b> |                          |                                         |                              |                            |
| PCR-severe-only                                                        | 6,300                    | 20,100                                  | 741,045,000                  | -                          |
| PCR-any-symptom                                                        | 3,500                    | 11,100                                  | 835,157,000                  | 10,000                     |
| PCR-all                                                                | 3,000                    | 9,700                                   | 1,248,341,000                | 286,000                    |
| Self-screen                                                            | 4,400                    | 14,100                                  | 1,323,221,000                | dominated                  |
| PCR-all-repeat                                                         | 2,100                    | 6,800                                   | 2,552,204,000                | 455,000                    |
| <b>Surging scenario (June 1, 2020 Re 2.0)</b>                          |                          |                                         |                              |                            |
| <b>Healthcare sector costs (Base case)</b>                             |                          |                                         |                              |                            |
| PCR-any-symptom                                                        | 11,800                   | 37,600                                  | 1,421,427,000                |                            |
| Universal PCR                                                          | 11,300                   | 36,000                                  | 1,673,911,000                | dominated                  |
| Self-screen                                                            | 14,700                   | 46,500                                  | 1,753,092,000                | dominated                  |
| PCR-severe-only                                                        | 17,300                   | 55,000                                  | 2,010,507,000                | dominated                  |
| PCR-all-repeat                                                         | 5,200                    | 16,600                                  | 2,532,432,000                | 53,000                     |
| <b>Healthcare sector + lost productivity costs</b>                     |                          |                                         |                              |                            |
| PCR-severe-only                                                        | 17,300                   | 55,000                                  | 2,078,894,000                | -                          |
| PCR-any-symptom                                                        | 14,700                   | 46,500                                  | 2,573,740,000                | dominated                  |
| PCR-all                                                                | 11,800                   | 37,600                                  | 2,837,965,000                | 30,000                     |
| PCR-all-repeat                                                         | 11,300                   | 36,000                                  | 3,439,898,000                | dominated                  |
| Self-screen                                                            | 5,200                    | 16,600                                  | 4,062,357,000                | 63,000                     |
| <b>Healthcare sector + lost productivity + averted mortality costs</b> |                          |                                         |                              |                            |
| PCR-severe-only                                                        | 17,300                   | 55,000                                  | 2,799,638,000                | -                          |
| PCR-any-symptom                                                        | 11,800                   | 37,600                                  | 3,066,548,000                | 15,000                     |
| PCR-all                                                                | 11,300                   | 36,000                                  | 3,309,817,000                | dominated                  |
| PCR-all-repeat                                                         | 5,200                    | 16,600                                  | 3,657,882,000                | dominated                  |
| Self-screen                                                            | 14,700                   | 46,500                                  | 4,672,483,000                | dominated                  |

Abbreviations: No., Number; PCR, Polymerase chain reaction; Re, Effective reproduction number; \$, US dollars; ICER, Incremental cost-effectiveness ratio; QALY, Quality-adjusted life-years

<sup>a</sup> Deaths and life-years lost are rounded to the nearest 100. Costs are rounded to the nearest 1,000.

**Supplementary Table 16.** Scenario analysis: incremental cost-effectiveness ratios incorporating costs related to productivity losses and averted COVID-19-related mortality (continued)

---

<sup>b</sup> Incremental cost effectiveness ratios are calculated by dividing the difference in total life-years lost by the difference in total healthcare-related costs compared to the next most expensive strategy. Dominated strategies are either more expensive and less effective (strong dominance) or more expensive and more effective but a less efficient than a subsequent strategy (weak dominance). Strategies are listed in order of increasing cost as per cost-effectiveness analysis convention.

---

## SUPPLEMENTARY FIGURE LEGENDS

### **Supplementary Figure 1.** Flow diagrams: Modeled SARS-CoV-2 testing strategies

Five population-based testing strategies: 1) PCR-severe-only: PCR testing only patients with severe/critical symptoms (*i.e.*, warranting hospital care); 2) Self-screen: PCR-severe-only and individuals self-assess the presence of COVID-19-consistent symptoms, using available smartphone applications or websites and self-isolate if positive; 3) PCR-any-symptom: PCR-severe-only and PCR for people with any COVID-19-consistent symptoms who self-isolate if positive; 4) PCR-all: PCR-any-symptom and a one-time PCR for the entire population  $n$ ; 5) PCR-all-repeat: PCR-all and re-testing every 30 days of those who test negative and remain asymptomatic. We assumed that a positive test leads to self-isolation (more effective than symptom-based self-isolation). For all strategies, those with severe or critical illness are sent to the hospital for evaluation and management.

Abbreviations:  $R_e$ , Effective reproduction number; PCR, polymerase chain reaction;  $S_x$ , symptom

**Supplementary Figure 2.** Health state transitions for a model of COVID-19 disease and testing

When infected, individuals face daily age-stratified probabilities of disease progression through seven health states, including latent infection, asymptomatic illness, mild/moderate illness, severe illness (warranting hospitalization), critical illness (warranting intensive care), recuperation, and recovery. While in the critical state, individuals face daily age-stratified probabilities of COVID-19-related death. Individuals transition to “recovered” when they no longer experience symptoms and pose no risk of transmitting to others. We assume recovered individuals are immune from repeat infection for the 180-day modeled horizon.

Abbreviations: Asympt., Asymptomatic; Mild/Mod., Mild/moderate

**Supplementary Figure 3.** One-way sensitivity analyses: Incident SARS-CoV-2 infections (2A-C) and mortality (2D-F) over 180 days in Massachusetts

The thick gray bars represent base case projections of incident infections (panels A-C) or mortality (panels D-F) for the PCR-severe-only and the 5 testing strategies. Each colored bar represents a one-way sensitivity analysis in which a key parameter was varied. The width of each bar indicates the relative sensitivity of model results to that parameter. The figure key lists the parameters that were varied, as well as the range through which each was varied in parentheses. Panels A and D represent slowing scenario in which the effective reproduction number ( $R_e$ ) on June 1 is 0.9. Panels B and E represent an intermediate scenario in which  $R_e$  on June 1 is 1.3, and panels C and F represent a surging scenario in which  $R_e$  on June 1 is 2.0.

Abbreviations:  $R_e$ , Effective reproduction number



**Supplementary Figure 4.** Two-way sensitivity analyses: PCR test cost and additional cost of offering a PCR test

In this two-way sensitivity analysis, PCR test cost and cost of offering the PCR test were varied. Incremental cost-effectiveness ratios (ICERs) are reported in \$/QALY for PCR-all testing versus the next least costly strategy at  $R_e$  0.9 and PCR-all-repeat testing versus the next least costly strategy at  $R_e$  2.0. The “X” represents the base case.

Abbreviations:  $R_e$ , Effective reproduction number; PCR: Polymerase chain reaction

**Supplementary Figure 1.** Flow diagrams: Modeled SARS-CoV-2 testing strategies

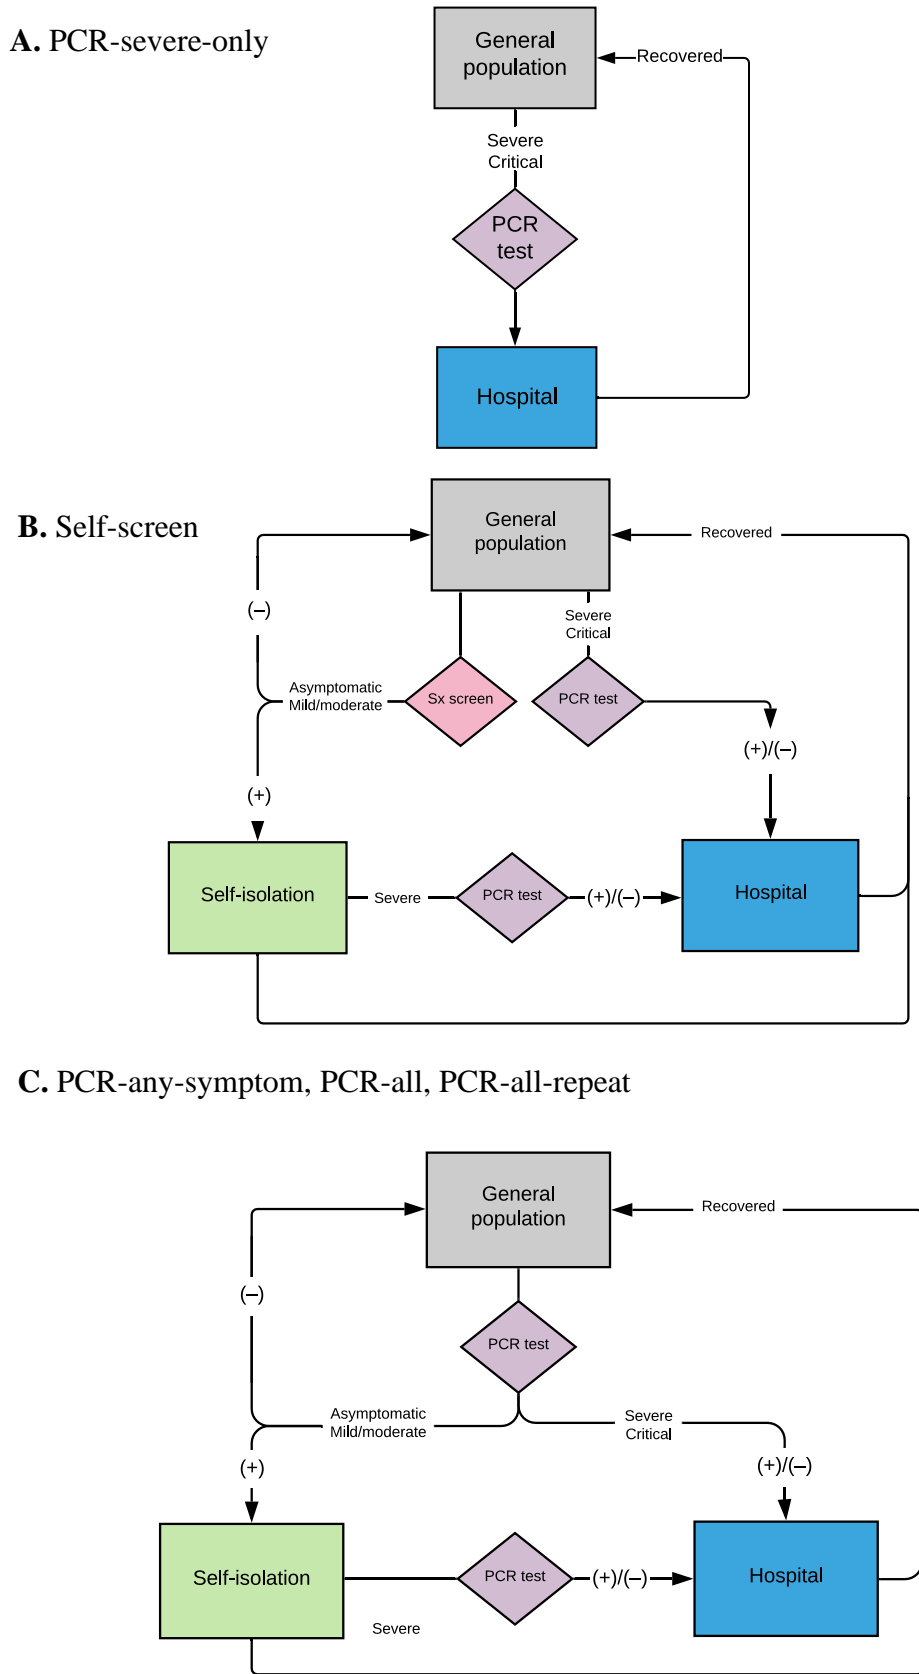

Supplementary Figure 2. Health state transitions for a model of COVID-19 disease and testing

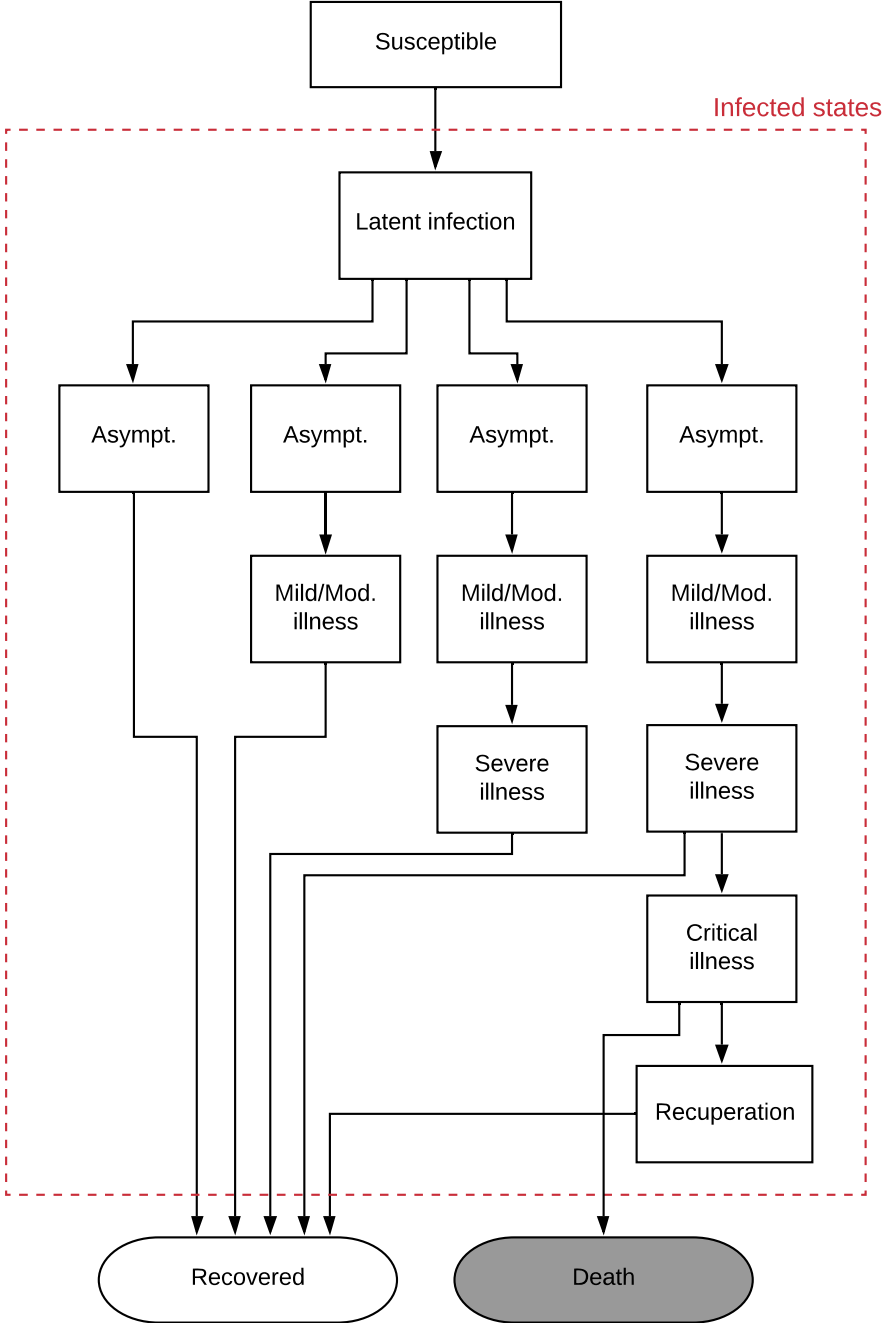

**Supplementary Figure 3.** One-way sensitivity analyses: Incident SARS-CoV-2 infections (2A-C) and mortality (2D-F) over 180 days in Massachusetts

**A.** Incident infections: slowing scenario (June 1, 2020  $R_e$  0.9)

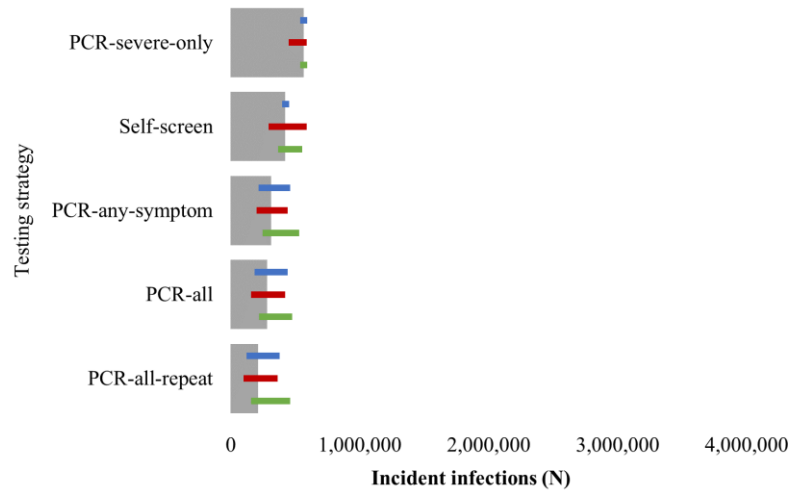

**B.** Incident infections: intermediate scenario (June 1, 2020  $R_e$  1.3)

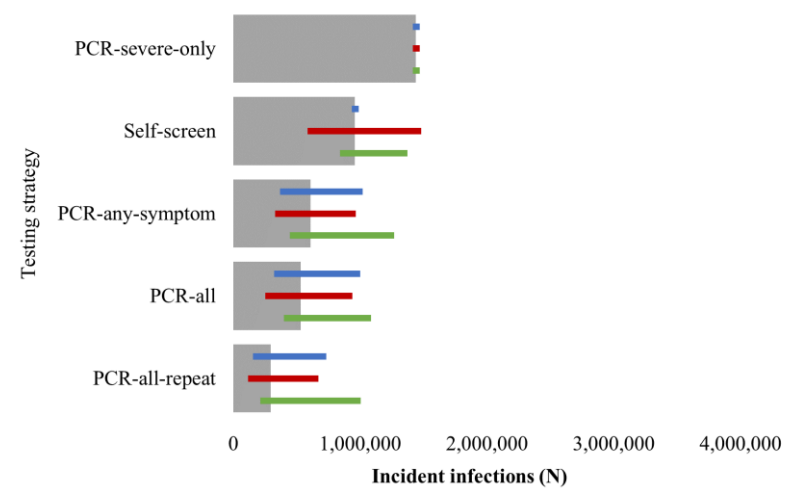

**C.** Incident infections: surging scenario (June 1, 2020  $R_e$  2.0)

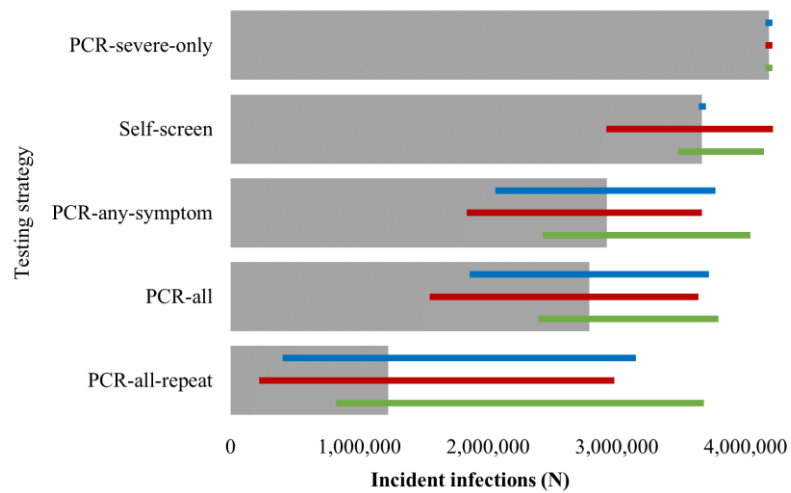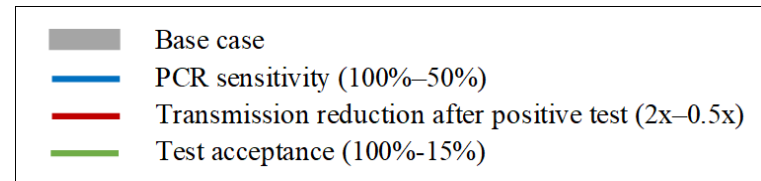

**Supplementary Figure 3.** One-way sensitivity analyses: Incident SARS-CoV-2 infections (2A-C) and mortality (2D-F) over 180 days in Massachusetts (continued)

**D. Mortality: slowing scenario (June 1, 2020  $R_e$  0.9)**

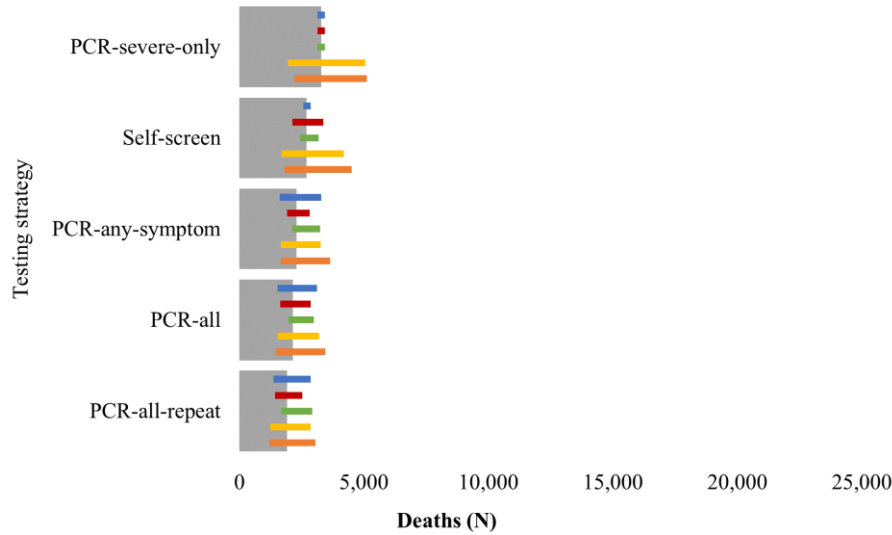

**E. Mortality: intermediate scenario (June 1, 2020  $R_e$  1.3)**

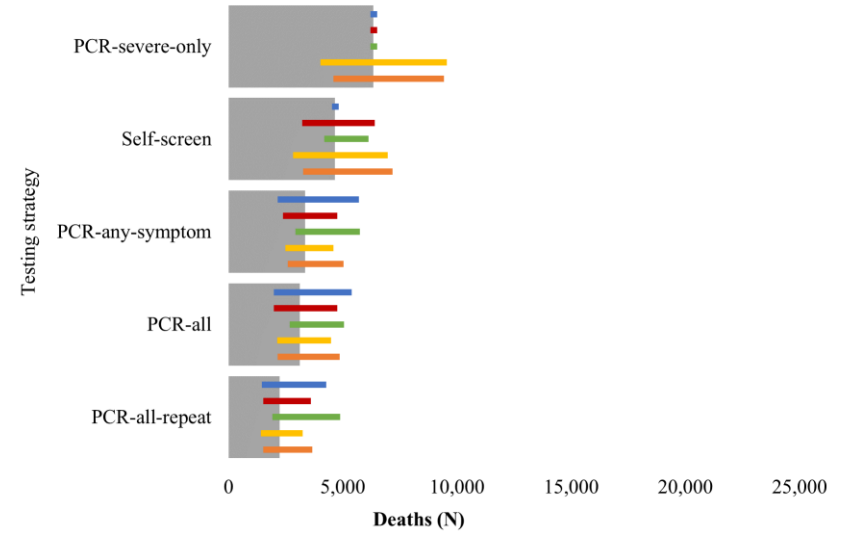

**F. Mortality: surging scenario (June 1, 2020  $R_e$  2.0)**

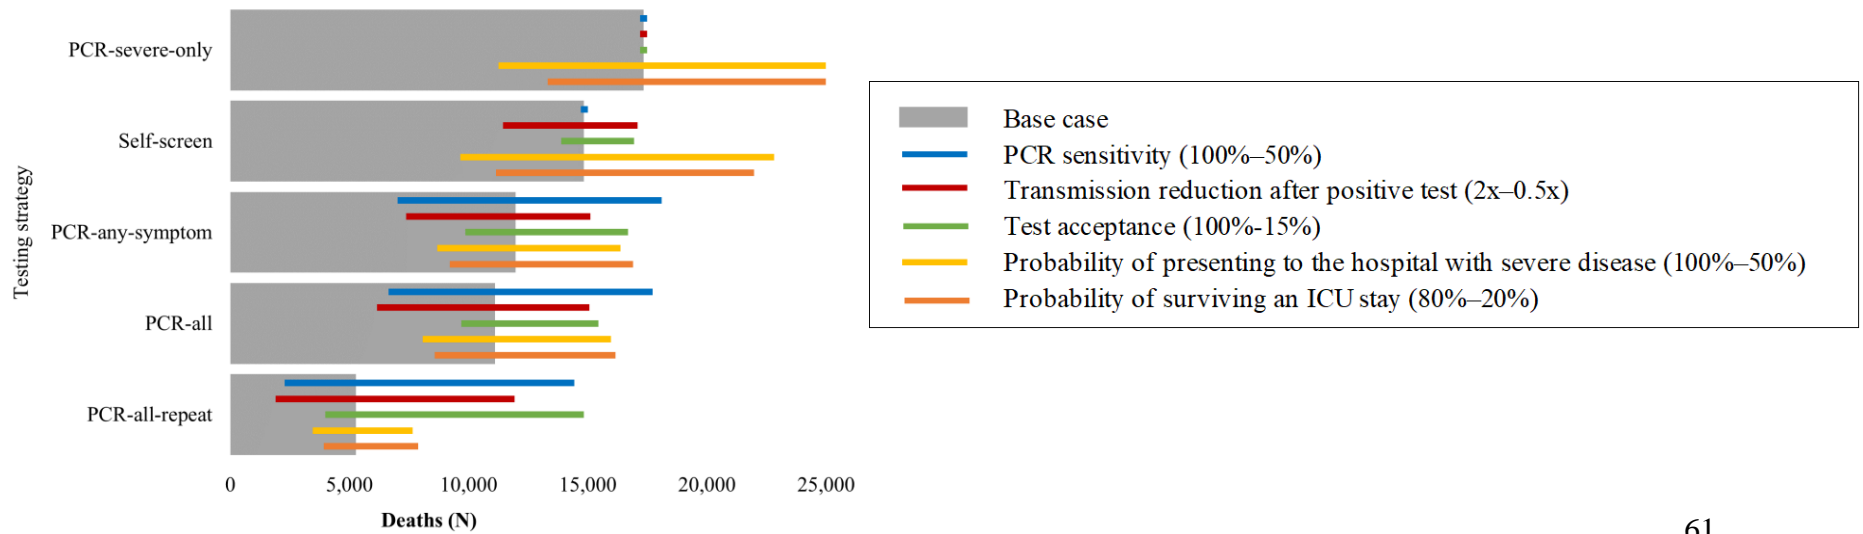

**Supplementary Figure 4.** Two-way sensitivity analyses: PCR test cost and additional cost of offering a PCR test

**A.** ICER for PCR-all-repeat strategy compared to the next less costly strategy in slowing scenario (June 1, 2020  $R_e$  0.9)

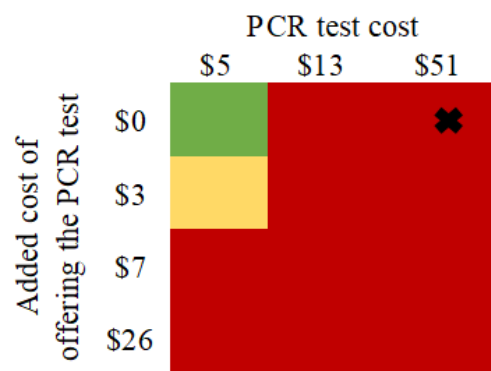

**B.** ICER for PCR-all-repeat strategy compared to the next less costly strategy in intermediate scenario (June 1, 2020  $R_e$  1.3)

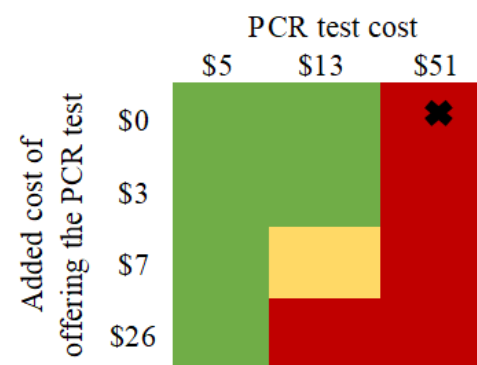

**C.** ICER for PCR-all-repeat strategy compared to the next less costly strategy in surging scenario (June 1, 2020  $R_e$  2.0)

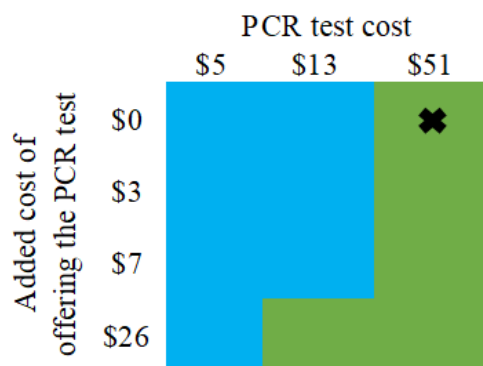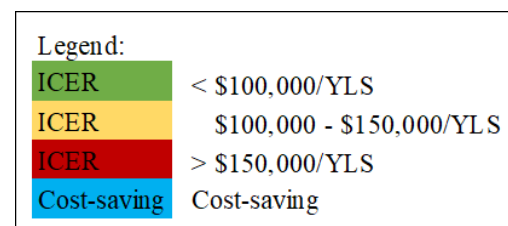

Supplement: 90727-2020.07.23.20160820-1.pdf [file 90727-2020.07.23.20160820-1.pdf]
